# Supplementary material for: New insights into the qualitative phenolic profile of Ficus carica L. fruits and leaves from Tunisia using ultra-high-performance liquid chromatography coupled to quadrupole-time-of-flight mass spectrometry and their antioxidant activity
Source: Royal Society of Chemistry journal article supplement (doi:10.1039/c4ra16746e), 2015-01-01
Supplement: c4ra16746e1.pdf [file c4ra16746e1.pdf]

### Non phenolic compounds information

Among other compounds, several amino acids were characterized in *F.carica* leaves and fruit (Table S1). Their elution pattern and fragmentation agreed with our previous studies.<sup>29</sup> In general, neutral losses of  $\text{NH}_3$  (17.0265 u) and  $\text{CO}_2$  (43.9898) from the amino- and caboxy-terminal, among other fragments, were observed in the MS/MS spectra. Furthermore, several organic acids were tentatively identified that were not equally distributed in *F. carica* extracts. Quinic, malic and citric acid were reported to be the most abundant organic acid in *F. carica* leaves and fruit.<sup>1,9,14,34</sup> Isopropylmalic acid was not found in the Moraceae family, but was detected in tomato (Solanaceae family)<sup>28</sup> and lettuce leaves,<sup>29</sup> as well as gluconic acid/galactonic acid.

### References

See references listed in the manuscript.

**Fig. S1:** UV-Vis spectra of several phenolic compounds types: vanillic acid, chlorogenic acid, quercetin, luteolin 7-*O*-glucoside, naringenin, (+)-catechin, genistein, 7-hydroxycoumarin and cyanidin 3-*O*-rutinoside, and psoralen.

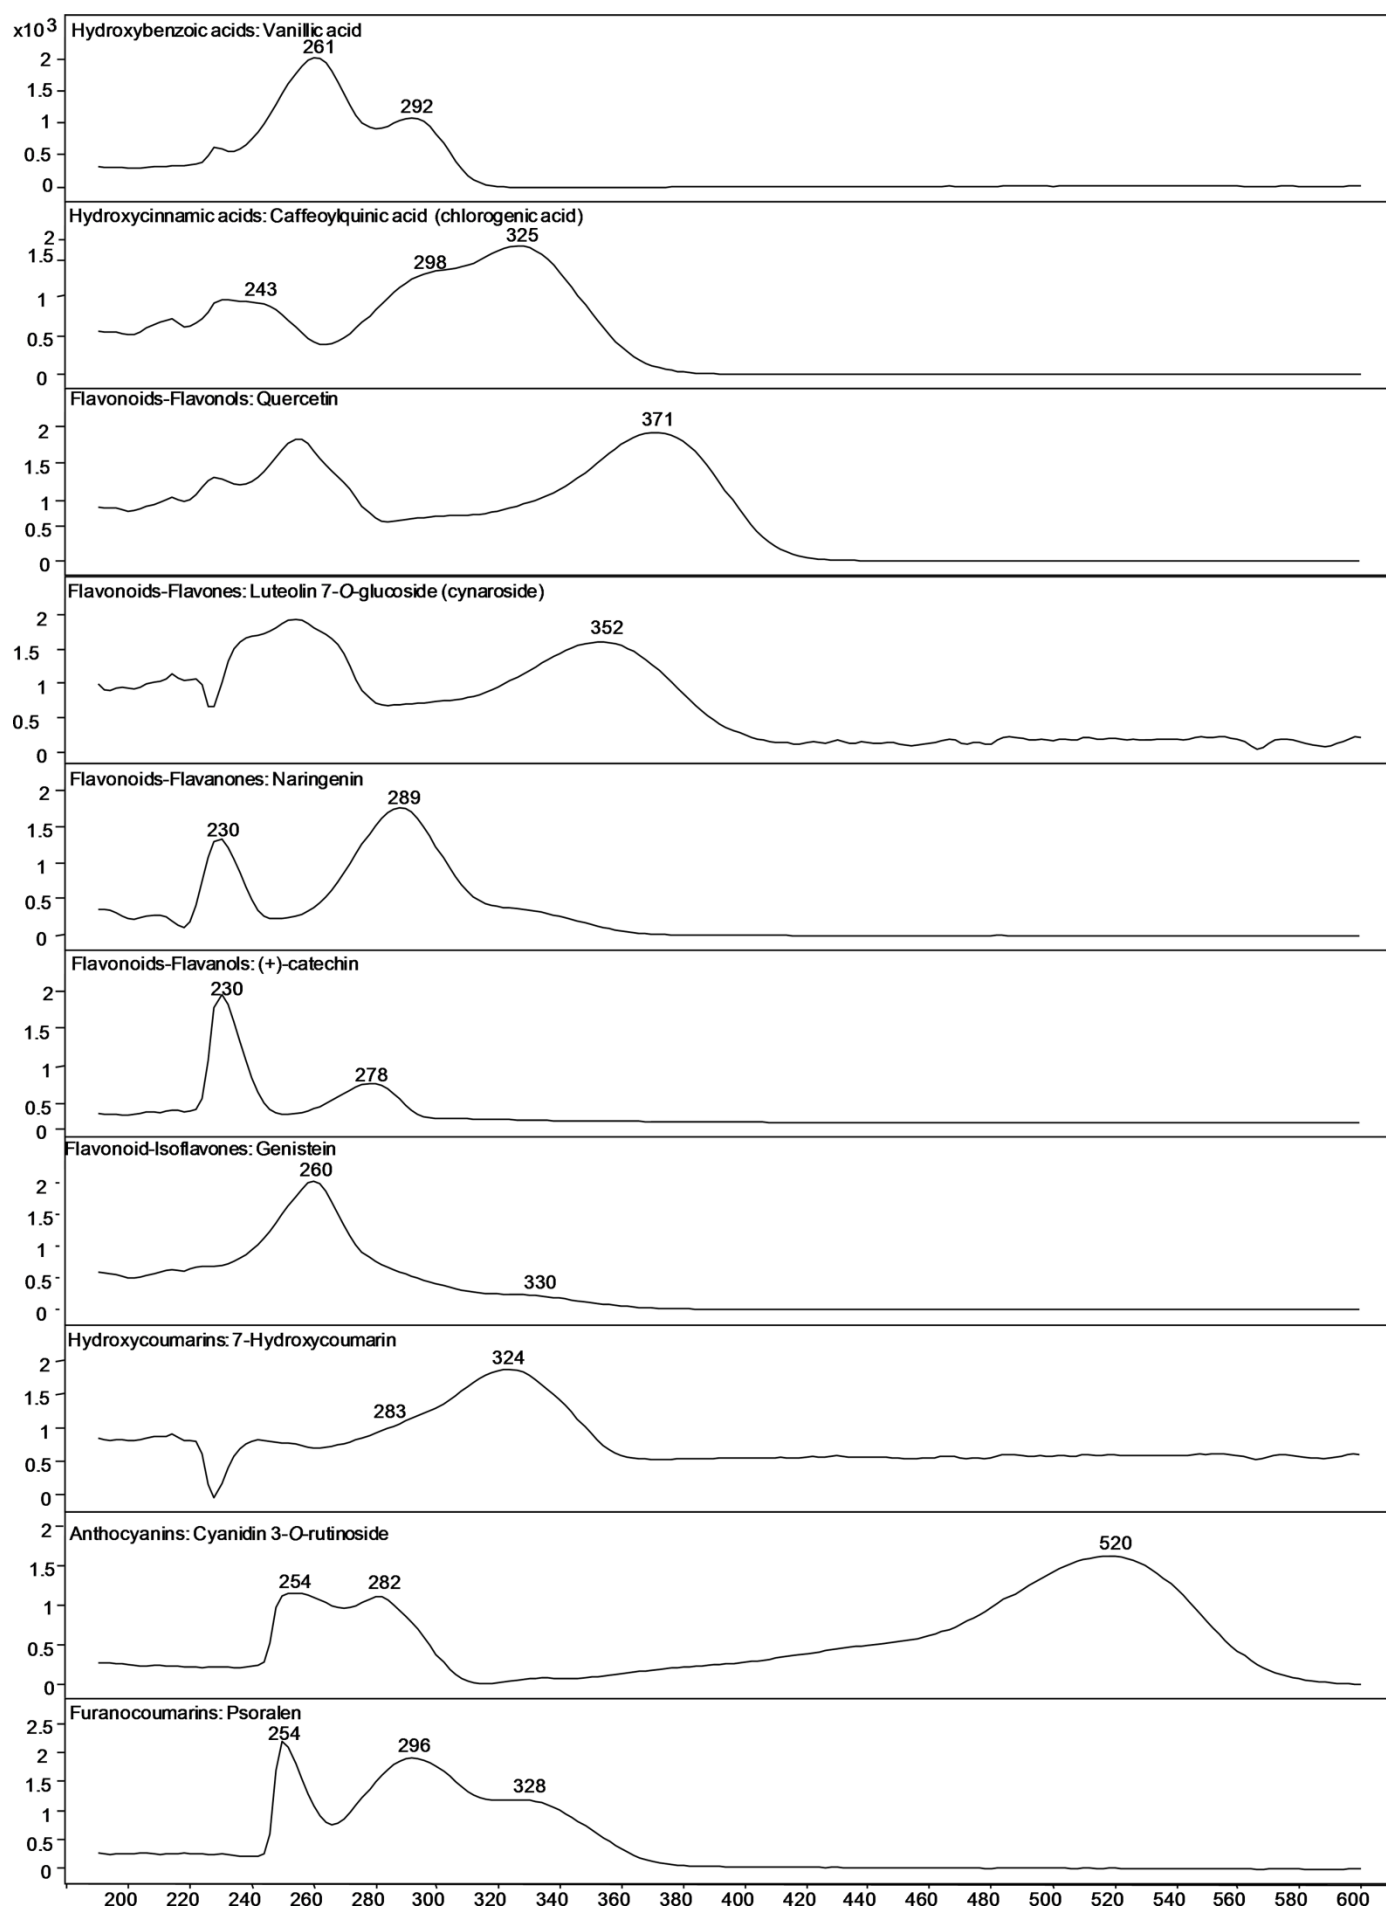

**Fig. S2:** General identification process for the characterization of quercetin 3-*O*-rutinoside and performed with the software Mass Hunter Qualitative Analysis B.06.00.

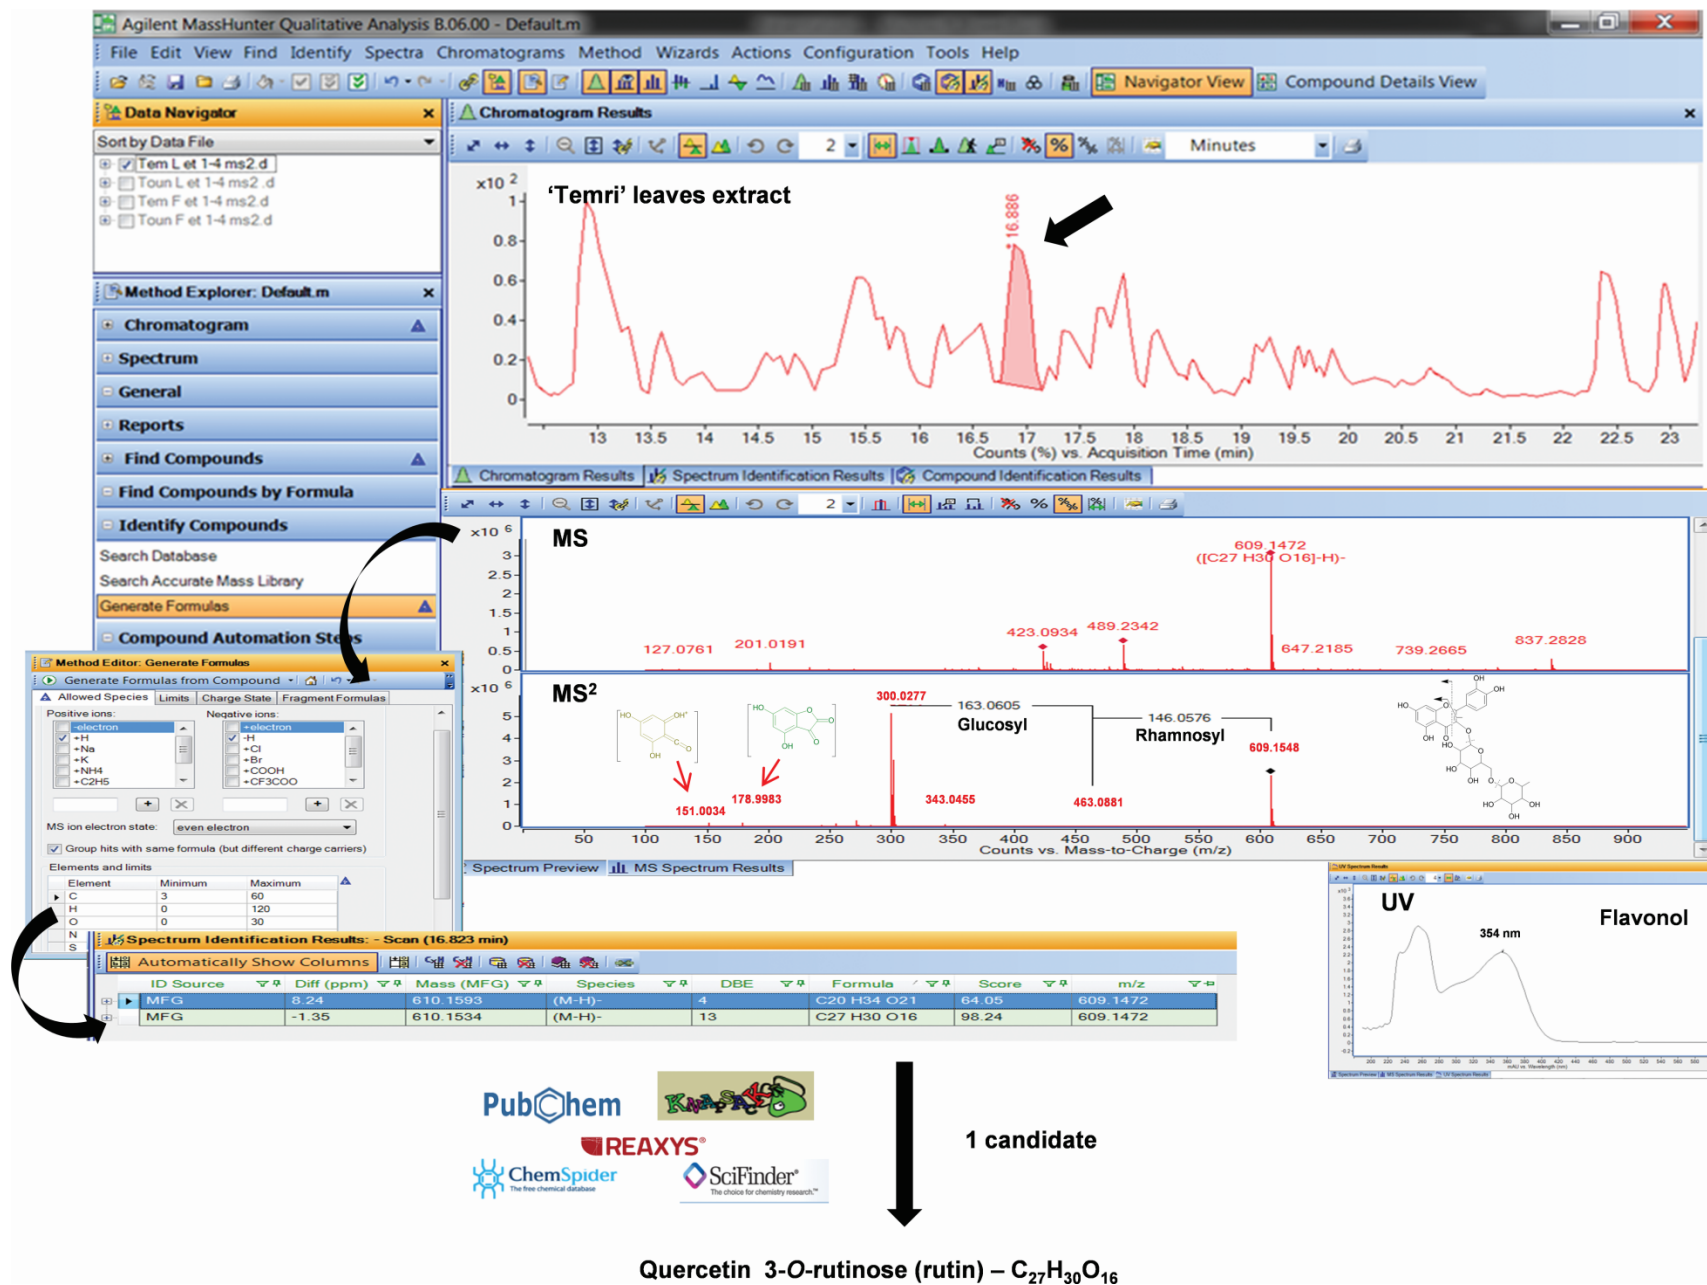

**Fig. S3:** Summary of the identification results, highlighting the number of compounds tentatively reported in *F. carica* for the first time in this work.

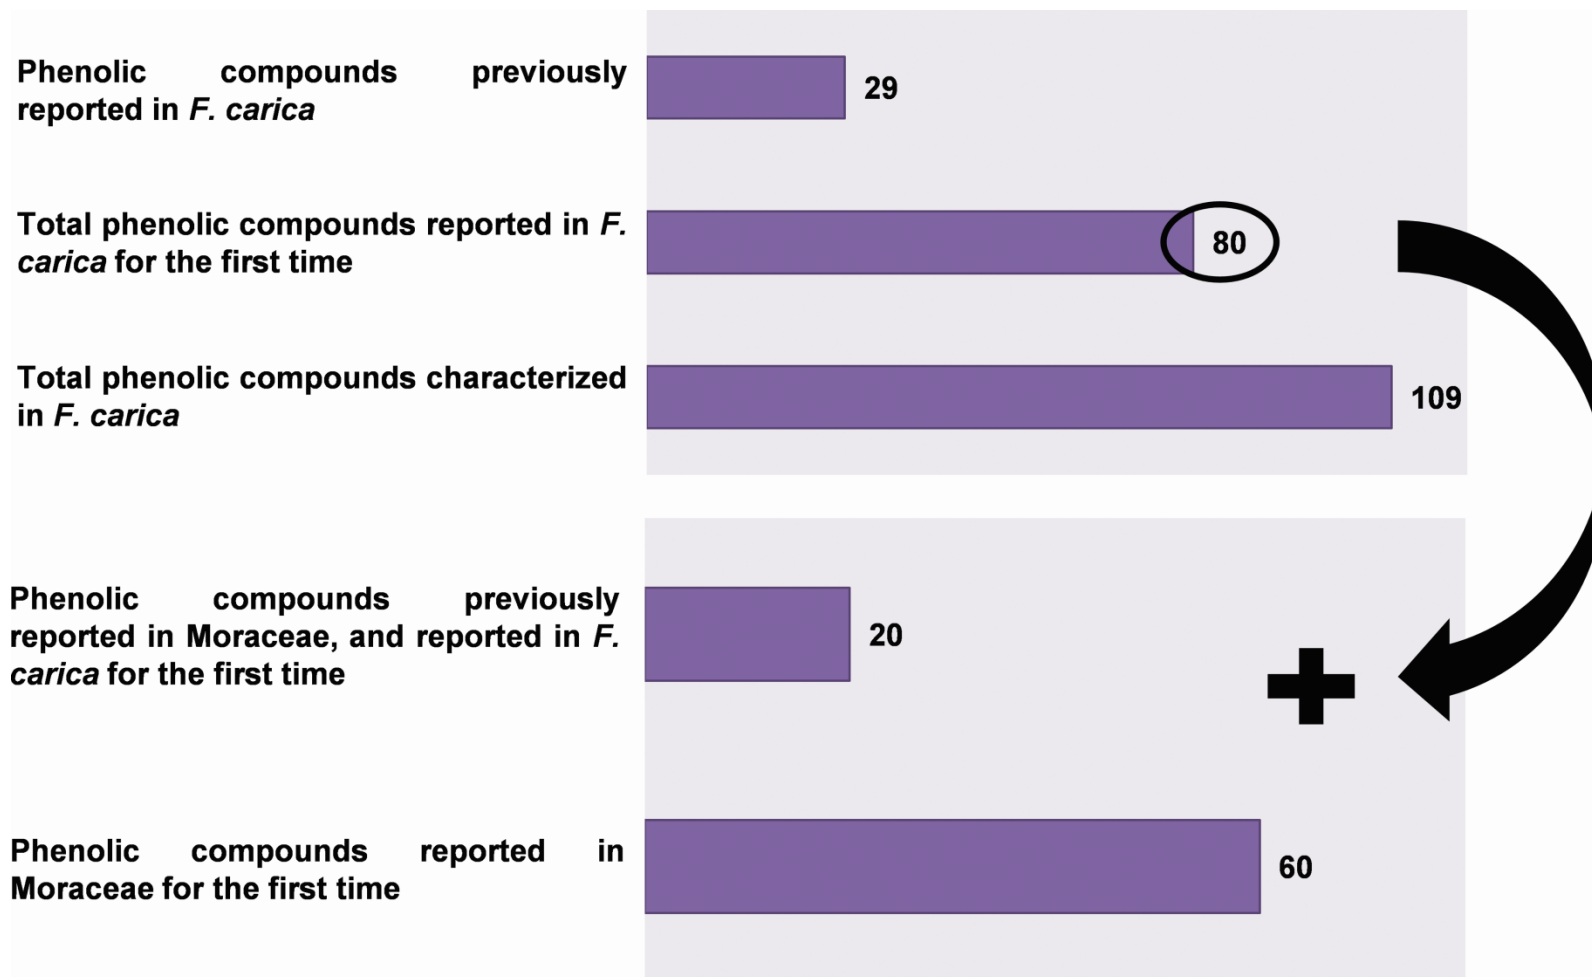

**Fig. S4:** Extracted ion chromatograms of the compounds: a) hydroxycinnamic acids, b) psoralic acid glucoside, and c) prenylated isoflavones in ‘Tounsi’ samples, and d) hydroxycinnamic acids, e) psoralic acid glucoside, and f) prenylated isoflavones in ‘Temri’ samples. The intensity of a and d, b and e as well as c and f was normalized to the largest area of these chromatograms.

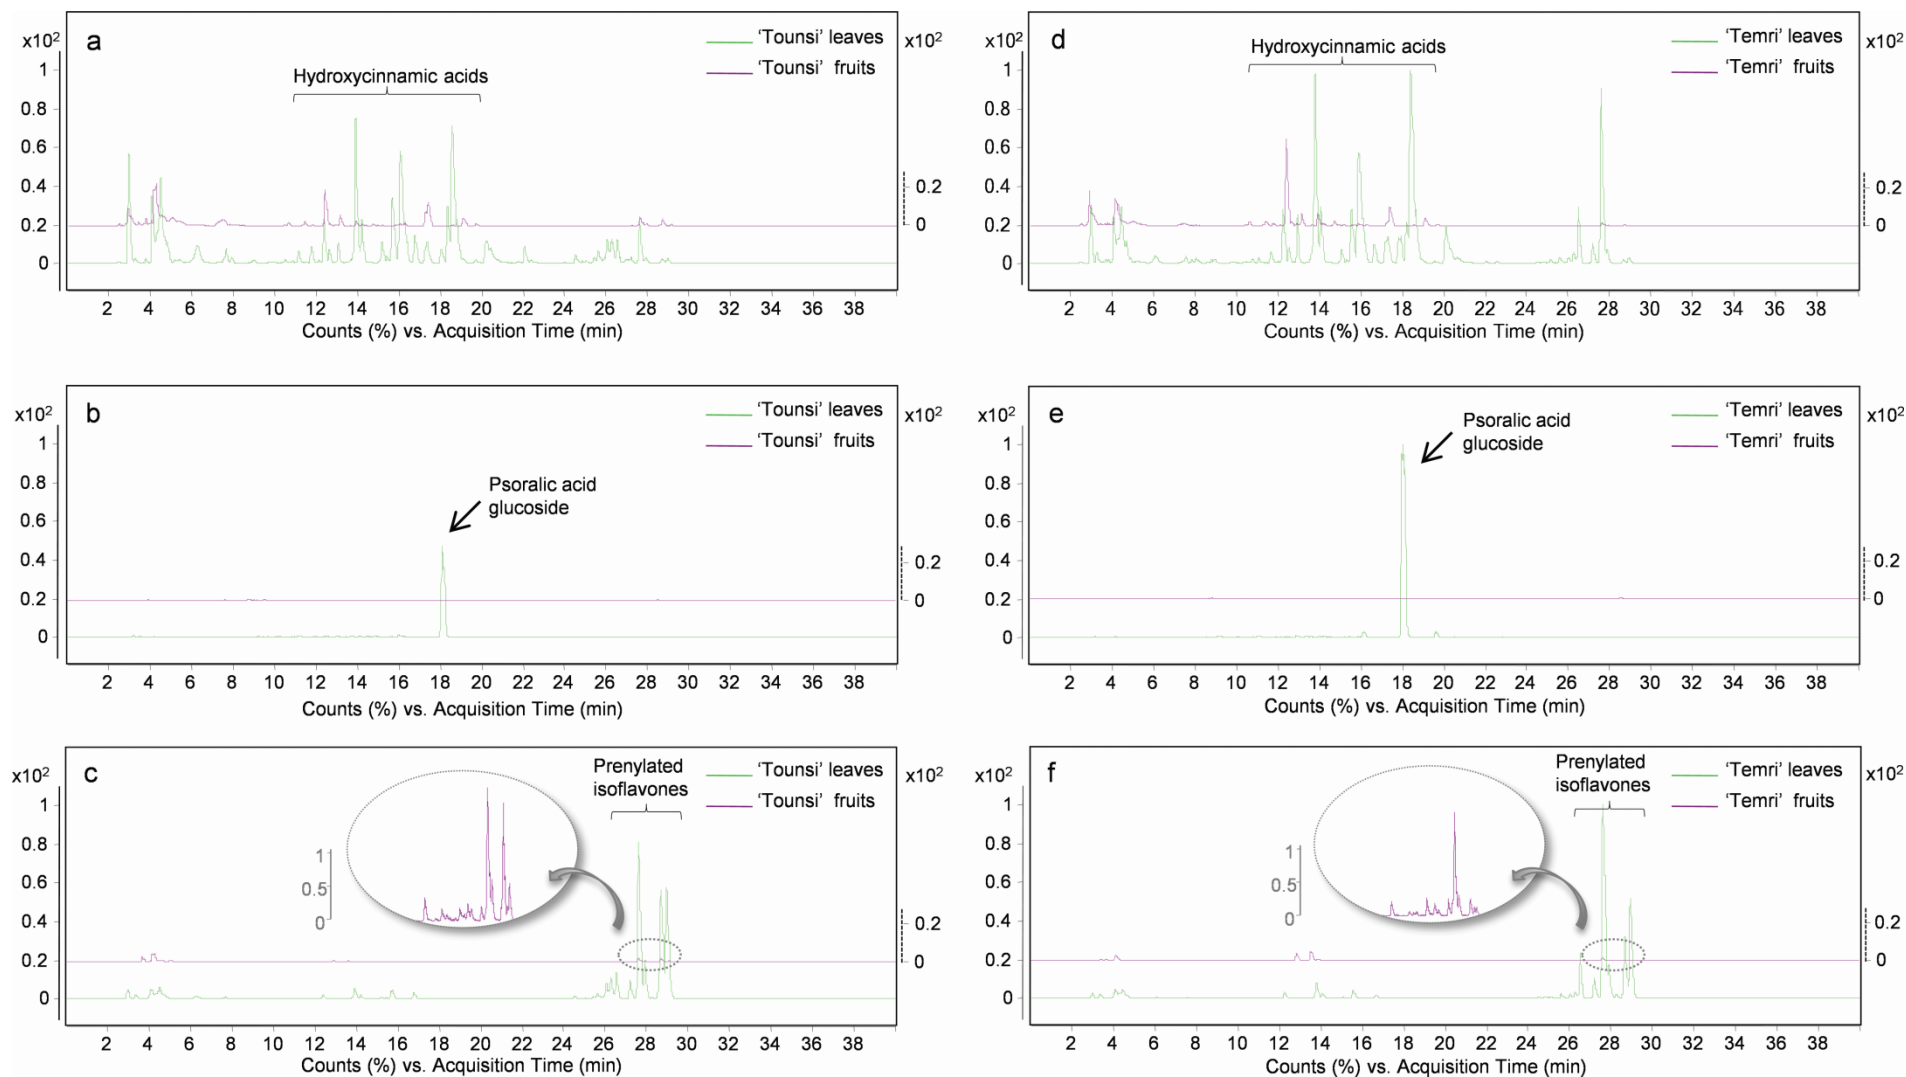

**Table S1:** Phenolic compounds characterized using the negative ionization mode in leaves and fruits of *F. carica* cultivars ‘Tounsi’ and ‘Temri’.

|                                             | RT<br>(min) | M        | [M-H] <sup>-</sup> | Formula                                         | Score | Error<br>(ppm) | UV<br>(nm)  | Main fragments<br>via MS/MS                                                            | Proposed<br>compound                       | Plant family                             | Ref.         | Presence |       |        |       |
|---------------------------------------------|-------------|----------|--------------------|-------------------------------------------------|-------|----------------|-------------|----------------------------------------------------------------------------------------|--------------------------------------------|------------------------------------------|--------------|----------|-------|--------|-------|
|                                             |             |          |                    |                                                 |       |                |             |                                                                                        |                                            |                                          |              | Tounsi   |       | Temri  |       |
|                                             |             |          |                    |                                                 |       |                |             |                                                                                        |                                            |                                          |              | Leaves   | Fruit | Leaves | Fruit |
| <i>Hydroxybenzoic acids and derivatives</i> |             |          |                    |                                                 |       |                |             |                                                                                        |                                            |                                          |              |          |       |        |       |
| 1                                           | 10.61       | 360.1053 | 359.0976           | C <sub>15</sub> H <sub>20</sub> O <sub>10</sub> | 94.7  | 1.6            | 280         | 197.0455;<br>179.0346;<br>153.0549;<br>135.0452;<br>85.0292                            | Syringic acid<br>hexoside I                | Asteraceae ( <i>Lactuca<br/>sativa</i> ) | <sup>1</sup> | +        | -     | +      | -     |
| 2                                           | 10.76       | 316.0794 | 315.0725           | C <sub>13</sub> H <sub>16</sub> O <sub>9</sub>  | 98.9  | -1.2           | -           | 153.0190;<br>152.0109;<br>108.0212;<br>109.0293                                        | Dihydroxybenzoic<br>acid hexoside I        | Asteraceae ( <i>Lactuca<br/>sativa</i> ) | <sup>1</sup> | +        | +     | +      | +     |
| 3                                           | 10.76       | 314.0638 | 313.0569           | C <sub>13</sub> H <sub>14</sub> O <sub>9</sub>  | 84.0  | -1.2           | 280         | 197.0462;<br>167.0354;<br>153.0559;<br>135.0454;<br>133.0145;<br>123.0455;<br>115.0039 | Syringic acid<br>malate I                  |                                          |              | +        | -     | +      | -     |
| 4                                           | 10.94       | 360.1067 | 359.0993           | C <sub>15</sub> H <sub>20</sub> O <sub>10</sub> | 89.3  | -2.9           | 280         | 197.0458;<br>179.0352;<br>153.0352;<br>135.0454;<br>123.0453;<br>85.0297               | Syringic acid<br>hexoside II               | Asteraceae ( <i>Lactuca<br/>sativa</i> ) | <sup>1</sup> | +        | -     | +      | -     |
| 5                                           | 11.07       | 330.0951 | 329.0886           | C <sub>14</sub> H <sub>18</sub> O <sub>9</sub>  | 80.3  | -2.4           | 255;<br>291 | 167.0345;<br>152.0111;<br>123.0450;<br>108.0213                                        | Vanillic acid<br>glucoside                 | Asteraceae ( <i>Lactuca<br/>sativa</i> ) | <sup>1</sup> | +        | +     | -      | +     |
| 6                                           | 11.07       | 314.0638 | 313.0573           | C <sub>13</sub> H <sub>14</sub> O <sub>9</sub>  | 82.7  | -2.7           | 280         | 179.0350;<br>135.0450;<br>133.0142;<br>115.0037                                        | Syringic acid<br>malate II                 |                                          |              | +        | -     | +      | -     |
| 7                                           | 11.09       | 476.1548 | 475.1473           | C <sub>20</sub> H <sub>28</sub> O <sub>13</sub> | 86.7  | -3.8           | -           | 329.0880;<br>167.0347;<br>109.0293                                                     | Vanillic acid<br>hexoside<br>deoxyhexoside |                                          |              | +        | -     | +      | -     |
| 8                                           | 11.19       | 434.1060 | 433.1002           | C <sub>17</sub> H <sub>22</sub> O <sub>13</sub> | 95.3  | -3.2           | 280         | 301.0564;<br>169.0138;                                                                 | Gallic acid di-<br>pentoside I             |                                          |              | +        | -     | +      | -     |

|    |       |          |          |                                                 |      |      |             |                                                                           |                                              |                                             |              |   |   |   |   |
|----|-------|----------|----------|-------------------------------------------------|------|------|-------------|---------------------------------------------------------------------------|----------------------------------------------|---------------------------------------------|--------------|---|---|---|---|
|    |       |          |          |                                                 |      |      |             | 168.0061;<br>151.0035;<br>125.0242                                        |                                              |                                             |              |   |   |   |   |
| 9  | 11.23 | 316.0794 | 315.0726 | C <sub>13</sub> H <sub>16</sub> O <sub>9</sub>  | 98.9 | -1.5 | -           | 153.0188;<br>109.0294                                                     | Dihydroxybenzoic acid hexoside II            | Asteraceae ( <i>Lactuca sativa</i> )        | <sup>1</sup> | + | + | + | + |
| 10 | 11.50 | 434.1060 | 433.0996 | C <sub>17</sub> H <sub>22</sub> O <sub>13</sub> | 98.2 | -1.6 | 280         | 301.0568;<br>169.0130;<br>168.0064;<br>151.0041;<br>125.0245              | Gallic acid di-pentoside II                  |                                             |              | + | + | + | + |
| 11 | 11.57 | 448.1217 | 447.1143 | C <sub>18</sub> H <sub>24</sub> O <sub>13</sub> | 99.3 | 0.4  | 305         | 315.0714;<br>271.0816;<br>152.0112;<br>109.0291;<br>108.0217              | Dihydroxybenzoic acid hexoside pentoside I   | Fagaceae ( <i>Lithocarpus polystachyu</i> ) | <sup>2</sup> | + | + | + | + |
| 12 | 12.32 | 448.1217 | 447.0900 | C <sub>18</sub> H <sub>24</sub> O <sub>13</sub> | 97.4 | 0.2  | 260;<br>297 | 152.0114;<br>109.0291                                                     | Dihydroxybenzoic acid hexoside pentoside II  | Fagaceae ( <i>Lithocarpus polystachyu</i> ) | <sup>2</sup> | + | + | + | + |
| 13 | 12.54 | 154.0266 | 153.0198 | C <sub>7</sub> H <sub>6</sub> O <sub>4</sub>    | 92.5 | -4.1 | 260;<br>290 | 109.0296;<br>108.0220                                                     | Dihydroxybenzoic acid                        | Moraceae ( <i>Ficus carica</i> )            | <sup>3</sup> | + | + | + | + |
| 14 | 12.56 | 316.0794 | 315.0723 | C <sub>13</sub> H <sub>16</sub> O <sub>9</sub>  | 99.7 | -0.5 | -           | 153.0194;<br>152.0194;<br>109.0291;<br>108.0219                           | Dihydroxybenzoic acid hexoside III           | Asteraceae ( <i>Lactuca sativa</i> )        | <sup>1</sup> | + | - | + | - |
| 15 | 12.62 | 286.0689 | 285.0613 | C <sub>12</sub> H <sub>14</sub> O <sub>8</sub>  | 97.3 | 1.2  | 260;<br>300 | 152.0115;<br>153.0191;<br>108.0217;<br>109.0295                           | Dihydroxybenzoic acid pentoside I            | Solanaceae ( <i>Solanum esculentum</i> )    | <sup>4</sup> | + | + | + | + |
| 16 | 12.68 | 448.1217 | 447.1151 | C <sub>18</sub> H <sub>24</sub> O <sub>13</sub> | 94.3 | -1.6 | -           | 153.0192;<br>109.0295                                                     | Dihydroxybenzoic acid hexoside pentoside III | Fagaceae ( <i>Lithocarpus polystachyu</i> ) | <sup>2</sup> | + | + | + | + |
| 17 | 13.17 | 286.0689 | 285.0621 | C <sub>12</sub> H <sub>14</sub> O <sub>8</sub>  | 85.2 | -1.4 | -           | 153.0191;<br>152.0113;<br>109.0294;<br>108.0219                           | Dihydroxybenzoic acid pentoside II           | Solanaceae ( <i>Solanum esculentum</i> )    | <sup>4</sup> | + | + | + | + |
| 18 | 13.25 | 418.1111 | 417.1043 | C <sub>17</sub> H <sub>22</sub> O <sub>12</sub> | 98.2 | -1.0 | 310         | 285.0613;<br>241.0718;<br>153.0165;<br>152.0119;<br>108.0217;<br>109.0287 | Dihydroxybenzoic acid di-pentoside           | Fabaceae ( <i>Cyclopia genistoides</i> )    | <sup>5</sup> | + | + | + | + |
| 19 | 14.66 | 138.0318 | 137.025  | C <sub>7</sub> H <sub>6</sub> O <sub>3</sub>    | 96.1 | -5.0 | -           | 109.0294;<br>108.0221;<br>93.0349;<br>92.0273                             | Hydroxybenzoic acid I                        | Asteraceae ( <i>Lactuca sativa</i> )        | <sup>1</sup> | + | - | + | - |

|                                              |       |          |          |                                                 |      |      |                     |                                                                           |                                            |                                          |                 |   |   |   |   |
|----------------------------------------------|-------|----------|----------|-------------------------------------------------|------|------|---------------------|---------------------------------------------------------------------------|--------------------------------------------|------------------------------------------|-----------------|---|---|---|---|
| 20                                           | 15.17 | 138.0319 | 137.0245 | C <sub>7</sub> H <sub>6</sub> O <sub>3</sub>    | 95.3 | -1.7 | -                   | 93.0344                                                                   | Hydroxybenzoic acid II                     | Asteraceae ( <i>Lactuca sativa</i> )     | <sup>1</sup>    | + | + | + | + |
| 21                                           | 15.90 | 168.0423 | 167.0349 | C <sub>8</sub> H <sub>8</sub> O <sub>4</sub>    | 96.9 | 0.9  | 261;<br>292         | 152.0110;<br>123.0431;<br>124.0163;<br>108.0214                           | Vanillic acid*                             |                                          |                 | + | + | + | + |
| <i>Hydroxycinnamic acids and derivatives</i> |       |          |          |                                                 |      |      |                     |                                                                           |                                            |                                          |                 |   |   |   |   |
| 22                                           | 11.19 | 516.1483 | 515.1408 | C <sub>22</sub> H <sub>28</sub> O <sub>14</sub> | 88.4 | -0.9 | 234;<br>264;<br>327 | 353.0881;<br>191.0560;<br>179.0346                                        | Caffeoylquinic acid hexoside I             | Asteraceae ( <i>Cynara scolymus</i> )    | <sup>6</sup>    | + | - | + | - |
| 23                                           | 11.75 | 516.1483 | 515.1408 | C <sub>22</sub> H <sub>28</sub> O <sub>14</sub> | 98.2 | -0.7 | 232;<br>262;<br>324 | 341.0872;<br>323.0771;<br>191.0559;<br>179.0348;<br>173.0451;<br>135.0451 | Caffeoylquinic acid hexoside II            | Asteraceae ( <i>Cynara scolymus</i> )    | <sup>6</sup>    | + | + | + | + |
| 24                                           | 12.31 | 354.0951 | 353.0884 | C <sub>16</sub> H <sub>18</sub> O <sub>9</sub>  | 98.3 | -1.3 | 230;<br>264;<br>328 | 191.0560;<br>179.0349;<br>135.0448                                        | Caffeoylquinic acid I                      | Moraceae ( <i>Ficus carica</i> )         | <sup>7-10</sup> | + | + | + | + |
| 25                                           | 12.37 | 344.1107 | 343.1043 | C <sub>15</sub> H <sub>20</sub> O <sub>9</sub>  | 95.9 | -2.7 | 282                 | 181.0508;<br>163.0400;<br>137.0609;<br>135.0443                           | Dihydrocaffeic acid hexose                 | Asteraceae ( <i>Lactuca sativa</i> )     | <sup>1</sup>    | + | + | + | + |
| 26                                           | 12.64 | 516.1483 | 515.1408 | C <sub>22</sub> H <sub>28</sub> O <sub>14</sub> | 98.5 | -1.0 | 280;<br>320         | 341.0773;<br>323.0773;<br>191.0560;<br>179.0347;<br>135.0446              | Caffeoylquinic acid hexoside III           | Asteraceae ( <i>Cynara scolymus</i> )    | <sup>6</sup>    | + | + | + | + |
| 27                                           | 12.89 | 356.1107 | 355.1038 | C <sub>16</sub> H <sub>20</sub> O <sub>9</sub>  | 99.1 | -1.0 | 322                 | 193.0502;<br>178.0267;<br>149.0606;<br>134.0369                           | Ferulic acid hexoside I                    | Solanaceae ( <i>Solanum esculentum</i> ) | <sup>4</sup>    | - | + | - | + |
| 28                                           | 13.79 | 338.1002 | 337.0926 | C <sub>16</sub> H <sub>18</sub> O <sub>8</sub>  | 81.3 | 0.8  | 300;<br>320         | 191.0557;<br>173.0454;<br>163.0399                                        | Coumaroylquinic acid I                     | Asteraceae ( <i>Lactuca sativa</i> )     | <sup>1</sup>    | + | - | + | - |
| 29                                           | 13.90 | 354.0951 | 353.0883 | C <sub>16</sub> H <sub>18</sub> O <sub>9</sub>  | 98.2 | -1.3 | 243;<br>298;<br>325 | 191.0566;<br>179.0347                                                     | Caffeoylquinic acid II* (chlorogenic acid) | Moraceae ( <i>Ficus carica</i> )         | <sup>7-10</sup> | + | + | + | + |
| 30                                           | 14.11 | 326.1003 | 325.0929 | C <sub>15</sub> H <sub>18</sub> O <sub>8</sub>  | 92.4 | -0.5 | 326                 | 163.0397;<br>119.0499                                                     | Comaroyl hexoside                          | Solanaceae ( <i>Solanum esculentum</i> ) | <sup>4</sup>    | - | + | - | + |
| 31                                           | 14.21 | 354.0951 | 353.0882 | C <sub>16</sub> H <sub>18</sub> O <sub>9</sub>  | 83.7 | -1.1 | 325                 | -                                                                         | Caffeoylquinic acid III                    | Moraceae ( <i>Ficus carica</i> )         | <sup>7-10</sup> | + | + | + | + |
| 32                                           | 14.72 | 356.1107 | 355.1036 | C <sub>16</sub> H <sub>20</sub> O <sub>9</sub>  | 99.3 | -0.4 | 323                 | 193.0502;                                                                 | Ferulic acid                               | Solanaceae                               | <sup>4</sup>    | - | + | - | + |



|    |       |          |          |                                                 |      |      |                     |                                                                                                      |                             |                                                 |               |   |   |   |   |
|----|-------|----------|----------|-------------------------------------------------|------|------|---------------------|------------------------------------------------------------------------------------------------------|-----------------------------|-------------------------------------------------|---------------|---|---|---|---|
|    |       |          |          |                                                 |      |      |                     | 178.0267;<br>149.0602;<br>134.0370                                                                   | hexoside II                 | ( <i>Solanum<br/>esculentum</i> )               |               |   |   |   |   |
| 33 | 15.28 | 354.0951 | 353.0885 | C <sub>16</sub> H <sub>18</sub> O <sub>9</sub>  | 83.2 | -1.6 | 232;<br>272;<br>328 | 191.0565                                                                                             | Caffeoylquinic acid<br>IV   | Moraceae ( <i>Ficus<br/>carica</i> )            | 7-10          | + | + | + | + |
| 34 | 15.61 | 338.1002 | 337.0929 | C <sub>16</sub> H <sub>18</sub> O <sub>8</sub>  | 98.4 | 0.5  | 234;<br>272;<br>328 | 191.0568                                                                                             | Coumaroylquinic<br>acid II  | Asteraceae ( <i>Lactuca<br/>sativa</i> )        | <sup>1</sup>  | + | - | + | - |
| 35 | 15.84 | 180.0436 | 179.036  | C <sub>9</sub> H <sub>8</sub> O <sub>4</sub>    | 94.5 | -5.5 | 241;<br>295;<br>324 | 135.056;<br>134.0377;<br>89.0399                                                                     | Caffeic acid*               | Moraceae ( <i>Ficus<br/>carica</i> )            | <sup>11</sup> | - | + | - | + |
| 36 | 16.03 | 296.0532 | 295.0467 | C <sub>13</sub> H <sub>12</sub> O <sub>8</sub>  | 95.9 | -2.5 | 298;<br>330         | 179.0350;<br>133.0143;<br>115.0038                                                                   | Caffeoylmalic acid          | Moraceae ( <i>Ficus<br/>carica</i> )            | <sup>9</sup>  | + | - | + | - |
| 37 | 16.83 | 338.1002 | 337.0929 | C <sub>16</sub> H <sub>18</sub> O <sub>8</sub>  | 99.8 | 0.0  | 232;<br>272;<br>326 | 191.0558                                                                                             | Coumaroylquinic<br>acid III | Asteraceae ( <i>Lactuca<br/>sativa</i> )        | <sup>1</sup>  | + | - | + | - |
| 38 | 17.30 | 386.1216 | 385.1144 | C <sub>17</sub> H <sub>22</sub> O <sub>10</sub> | 82.0 | -0.9 | 234;<br>268;<br>326 | 267.0724;<br>249.0617;<br>223.0458;<br>205.0353;<br>147.0294;<br>113.0241;<br>91.0551;<br>85.0294    | Sinapic acid<br>hexoside    | Solanaceae<br>( <i>Solanum<br/>esculentum</i> ) | <sup>4</sup>  | + | + | + | + |
| 39 | 18.01 | 280.0583 | 279.0513 | C <sub>13</sub> H <sub>12</sub> O <sub>7</sub>  | 99.0 | -1.0 | 248;<br>291;<br>324 | 163.0398;<br>133.0139;<br>119.0499;<br>115.0033                                                      | Coumaroylmalic<br>acid I    | Fabaceae ( <i>Pisum<br/>sativum</i> )           | <sup>12</sup> | + | - | + | - |
| 40 | 18.10 | 340.0794 | 339.0729 | C <sub>15</sub> H <sub>16</sub> O <sub>9</sub>  | 98.1 | -1.7 | 244;<br>286;<br>330 | 309.0621;<br>223.0616;<br>208.0372;<br>193.0507;<br>164.0480;<br>149.02543;<br>133.0142;<br>115.0039 | Sinapic acid malate         | Brassicaceae<br>( <i>Arabidopsis thaliana</i> ) | <sup>13</sup> | + | - | + | - |
| 41 | 18.25 | 280.0583 | 279.051  | C <sub>13</sub> H <sub>12</sub> O <sub>7</sub>  | 99.2 | 0.0  | 236;<br>298;<br>320 | 163.0401;<br>133.0139;<br>119.0500;<br>115.0033                                                      | Coumaroylmalic<br>acid II   | Fabaceae ( <i>Pisum<br/>sativum</i> )           | <sup>12</sup> | + | - | + | - |
| 42 | 18.40 | 310.0689 | 309.0625 | C <sub>14</sub> H <sub>14</sub> O <sub>8</sub>  | 96.0 | -2.8 | 240;<br>286;<br>325 | 193.0510;<br>178.0267;<br>149.0607;                                                                  | Ferulic acid malate<br>I    | Solanaceae<br>( <i>Solanum<br/>tuberosum</i> )  | <sup>14</sup> | + | - | + | - |

|                             |       |          |          |                                                 |      |      |                     |                                                                                                                  |                                                         |                                                |         |   |   |   |   |
|-----------------------------|-------|----------|----------|-------------------------------------------------|------|------|---------------------|------------------------------------------------------------------------------------------------------------------|---------------------------------------------------------|------------------------------------------------|---------|---|---|---|---|
| 43                          | 18.67 | 310.0689 | 309.0623 | C <sub>14</sub> H <sub>14</sub> O <sub>8</sub>  | 98.0 | -2.0 | 240;<br>288;<br>320 | 133.0146;<br>115.0039;<br>193.0556;<br>134.0371                                                                  | Ferulic acid malate<br>II                               | Solanaceae<br>( <i>Solanum<br/>tuberosum</i> ) | 14      | + | - | + | - |
| 44                          | 19.09 | 194.0579 | 193.0511 | C <sub>10</sub> H <sub>10</sub> O <sub>4</sub>  | 98.3 | -2.0 | 238;<br>293;<br>325 | 134.0373                                                                                                         | <i>Trans</i> -ferulic acid*                             | Moraceae ( <i>Ficus<br/>carica</i> )           | 8       | - | + | - | + |
| 45                          | 19.62 | 194.0579 | 193.0503 | C <sub>10</sub> H <sub>10</sub> O <sub>4</sub>  | 84.7 | 0.3  | 238;<br>282;<br>325 | 134.0373                                                                                                         | Ferulic acid isomer                                     |                                                |         | - | + | - | + |
| <i>Flavonoids-Flavonols</i> |       |          |          |                                                 |      |      |                     |                                                                                                                  |                                                         |                                                |         |   |   |   |   |
| 46                          | 13.09 | 772.2075 | 771.2002 | C <sub>33</sub> H <sub>40</sub> O <sub>21</sub> | 97.5 | -1.7 | 356                 | 609.1459;<br>462.0801;<br>463.0871;<br>301.0352;<br>300.0258                                                     | Quercetin <i>O</i> -<br>deoxyhexoside di-<br>hexoside   | Several families <sup>a</sup>                  |         | + | + | + | + |
| 47                          | 13.39 | 626.1483 | 625.141  | C <sub>27</sub> H <sub>30</sub> O <sub>17</sub> | 87.5 | -1.0 | 346                 | 463.0893;<br>462.0814;<br>301.0360                                                                               | Quercetin <i>O</i> -di-<br>hexoside                     | Several families <sup>a</sup>                  |         | + | + | + | + |
| 48                          | 15.59 | 756.2113 | 755.2052 | C <sub>33</sub> H <sub>40</sub> O <sub>20</sub> | 94.1 | -1.6 | 356                 | 301.0359;<br>300.0279                                                                                            | Quercetin di-<br>deoxyhexoside<br>hexoside              | Several families <sup>a</sup>                  |         | + | + | + | + |
| 49                          | 17.18 | 610.1534 | 609.1486 | C <sub>27</sub> H <sub>30</sub> O <sub>16</sub> | 93.8 | -1.9 | 354                 | 463.0890;<br>300.0278;<br>273.0398;<br>257.0448;<br>229.0502;<br>178.9983;<br>121.0297;<br>151.0036;<br>107.0142 | Quercetin-3- <i>O</i> -<br>rutinoside* (rutin)          | Moraceae ( <i>Ficus<br/>carica</i> )           | 7-9,15  | + | + | + | + |
| 50                          | 17.94 | 464.0955 | 463.0888 | C <sub>21</sub> H <sub>20</sub> O <sub>12</sub> | 99.8 | -0.3 | 354                 | 301.0349;<br>300.0278;<br>151.0037                                                                               | Quercetin-3- <i>O</i> -<br>glucoside*<br>(isoquercetin) | Moraceae ( <i>Ficus<br/>carica</i> )           | 8-10,15 | + | + | + | + |
| 51                          | 18.68 | 550.0955 | 549.0882 | C <sub>24</sub> H <sub>22</sub> O <sub>15</sub> | 99.2 | 0.6  | 354                 | 505.0986;<br>463.0874;<br>301.0351;<br>300.0276                                                                  | Quercetin 3- <i>O</i> -(6"-<br>malonyl)glucoside        | Moraceae ( <i>Ficus<br/>carica</i> )           | 9       | + | + | + | + |
| 52                          | 23.05 | 302.0427 | 301.0373 | C <sub>15</sub> H <sub>10</sub> O <sub>7</sub>  | 83.2 | -0.8 | 371                 | 273.0399;<br>178.9983;<br>151.0034;<br>121.0296;<br>107.0139                                                     | Quercetin*                                              | Moraceae ( <i>Ficus<br/>carica</i> )           | 11,16   | - | + | - | + |

Flavonoids-Flavones

|    |       |          |          |                                                 |      |      |     |                                                                                                                   |                                                          |                                        |               |   |   |   |   |
|----|-------|----------|----------|-------------------------------------------------|------|------|-----|-------------------------------------------------------------------------------------------------------------------|----------------------------------------------------------|----------------------------------------|---------------|---|---|---|---|
| 53 | 14.76 | 580.1428 | 579.1367 | C <sub>26</sub> H <sub>28</sub> O <sub>15</sub> | 87.3 | -3.3 | 344 | 561.1251;<br>519.1156;<br>489.1044;<br>459.0938;<br>429.0834;<br>399.0727;<br>369.0623;<br>285.0499;<br>133.0289  | Luteolin C-<br>hexoside C-<br>pentoside I                | Moraceae ( <i>Ficus carica</i> )       | <sup>15</sup> | + | + | + | + |
| 54 | 14.89 | 580.1433 | 579.136  | C <sub>26</sub> H <sub>28</sub> O <sub>15</sub> | 96.3 | -0.7 | 354 | 561.1254;<br>519.1153;<br>489.1049;<br>459.0939;<br>429.0834;<br>399.0723;<br>369.0624;<br>285.0400;<br>133.0297  | Luteolin C-<br>hexoside C-<br>pentoside II               | Moraceae ( <i>Ficus carica</i> )       | <sup>15</sup> | + | + | + | + |
| 55 | 15.10 | 564.1479 | 563.1415 | C <sub>26</sub> H <sub>28</sub> O <sub>14</sub> | 98.3 | -1.5 | 336 | 545.1321;<br>503.1212;<br>473.1097;<br>443.0988;<br>383.0786;<br>353.0669;<br>325.0733;<br>297.0766;<br>117.0347  | Apigenin C-<br>hexoside C-<br>pentoside I <sup>b</sup>   | Moraceae ( <i>Ficus carica</i> )       | <sup>9</sup>  | + | + | + | + |
| 56 | 15.60 | 564.1488 | 563.1435 | C <sub>26</sub> H <sub>28</sub> O <sub>14</sub> | 88.3 | -4.7 | 335 | 545.1312;<br>503.1203;<br>473.1104;<br>443.0999;<br>383.07858;<br>353.0680;<br>325.0726;<br>297.0778;<br>117.0343 | Apigenin C-<br>hexoside C-<br>pentoside II <sup>b</sup>  | Moraceae ( <i>Ficus carica</i> )       | <sup>9</sup>  | + | + | + | + |
| 57 | 16.00 | 448.1006 | 447.0937 | C <sub>21</sub> H <sub>20</sub> O <sub>11</sub> | 98.7 | -1.0 | 350 | 429.0821;<br>387.2027;<br>357.0615;<br>327.0512;<br>285.0404;<br>133.0138                                         | Luteolin 6-C-<br>glucoside<br>(isoorientin) <sup>c</sup> | Arecaceae ( <i>Elaeis guineensis</i> ) | <sup>17</sup> | + | + | + | + |
| 58 | 16.21 | 564.1479 | 563.142  | C <sub>26</sub> H <sub>28</sub> O <sub>14</sub> | 84.5 | -3.3 | 330 | 545.1302;                                                                                                         | Apigenin 6-C-                                            | Moraceae ( <i>Ficus</i>                | <sup>9</sup>  | + | + | + | + |

|    |       |          |          |                                                 |      |      |     |                                                                                                                                           |                                                                |                                                                                          |       |   |   |   |   |
|----|-------|----------|----------|-------------------------------------------------|------|------|-----|-------------------------------------------------------------------------------------------------------------------------------------------|----------------------------------------------------------------|------------------------------------------------------------------------------------------|-------|---|---|---|---|
|    |       |          |          |                                                 |      |      |     | 503.1195;<br>473.1092;<br>443.0989;<br>383.0777;<br>353.0670;<br>297.0766;<br>117.0357                                                    | hexose-8- <i>C</i> -pentose<br>III <sup>b</sup>                | <i>carica</i> )                                                                          |       |   |   |   |   |
| 59 | 16.58 | 448.1006 | 447.0938 | C <sub>21</sub> H <sub>20</sub> O <sub>11</sub> | 98.7 | -1.3 | 350 | 357.0608;<br>327.0507;<br>285.0398;<br>133.0291                                                                                           | Luteolin 8- <i>C</i> -<br>glucoside<br>(orientin) <sup>c</sup> | Moraceae( <i>Ficus<br/>carica</i> ); Arecaceae<br>( <i>Elaeis guineensis</i> )           | 10,17 | + | + | + | + |
| 60 | 16.80 | 578.1636 | 577.1579 | C <sub>27</sub> H <sub>30</sub> O <sub>14</sub> | 98.2 | -2.0 | 330 | 457.1140;<br>413.0880;<br>293.0455                                                                                                        | Apigenin <i>C</i> -<br>hexoside 8- <i>C</i> -<br>deoxyhexoside | Arecaceae ( <i>Elaeis<br/>guineensis</i> )                                               | 17    | + | + | + | + |
| 61 | 17.42 | 432.1056 | 431.0989 | C <sub>21</sub> H <sub>20</sub> O <sub>10</sub> | 99.4 | -1.2 | 326 | 341.0663;<br>311.0553;<br>283.0603;<br>269.0444;<br>268.0372;<br>117.0342                                                                 | Apigenin 8- <i>C</i> -<br>glucoside (vitexin)                  | Moraceae ( <i>Ficus<br/>deltoidea</i> )                                                  | 18    | + | + | + | + |
| 62 | 17.82 | 448.1006 | 447.0932 | C <sub>21</sub> H <sub>20</sub> O <sub>11</sub> | 89.9 | -1.0 | 352 | 285.0406;<br>284.0327;<br>197.0806;<br>175.0282;<br>133.0294                                                                              | Luteolin 7- <i>O</i> -<br>glucoside*<br>(cynaroside)           | Several families <sup>a</sup>                                                            |       | + | + | + | + |
| 63 | 22.46 | 286.0477 | 285.0407 | C <sub>15</sub> H <sub>10</sub> O <sub>6</sub>  | 95.7 | -1.8 | 349 | 267.0298;<br>257.0453;<br>243.0297;<br>241.504;<br>217.0506;<br>213.0549;<br>199.0396;<br>197.0604;<br>175.0395;<br>151.0031;<br>133.0295 | Luteolin *                                                     | Moraceae ( <i>Ficus<br/>carica</i> )                                                     | 3     | + | + | + | + |
| 64 | 24.29 | 270.0528 | 269.0459 | C <sub>15</sub> H <sub>10</sub> O <sub>5</sub>  | 98.8 | 0.0  | 336 | 241.0495;<br>227.0352;<br>225.0553;<br>201.0551;<br>183.0445;<br>181.650;<br>159.0457;<br>151.0033;<br>149.0240;                          | Apigenin*                                                      | Moraceae ( <i>Ficus<br/>formosana</i> ; <i>Ficus<br/>hirta</i> ; <i>Ficus tsiangii</i> ) | 19,20 | + | + | + | + |

|    |                       |                |          |                                                 |      |      |     |                                                                                        |                                                     |                                                                      |          |   |   |   |   |
|----|-----------------------|----------------|----------|-------------------------------------------------|------|------|-----|----------------------------------------------------------------------------------------|-----------------------------------------------------|----------------------------------------------------------------------|----------|---|---|---|---|
|    |                       |                |          |                                                 |      |      |     | 117.0344;<br>107.0137                                                                  |                                                     |                                                                      |          |   |   |   |   |
|    | Flavonoids-Flavanones |                |          |                                                 |      |      |     |                                                                                        |                                                     |                                                                      |          |   |   |   |   |
| 65 | 16.09                 | 612.169        | 611.1624 | C <sub>27</sub> H <sub>32</sub> O <sub>16</sub> | 94.2 | -1.5 | 280 | 449.1094;<br>287.0563;<br>151.0036;<br>135.0445                                        | Eriodictyol di-<br>hexoside                         | Several families <sup>a</sup>                                        |          | - | - | - | + |
| 66 | 17.95                 | 450.1162       | 449.1099 | C <sub>21</sub> H <sub>22</sub> O <sub>11</sub> | 96.2 | -2.3 | 280 | 287.0565;<br>151.0039;<br>135.0451;<br>107.0142                                        | Eriodictyol<br>hexoside I                           | Several families <sup>a</sup>                                        |          | - | - | - | + |
| 67 | 19.87                 | 450.1162       | 449.1086 | C <sub>21</sub> H <sub>22</sub> O <sub>11</sub> | 96.0 | 0.9  | 286 | 287.058;<br>151.0033;<br>135.0450;<br>107.0138                                         | Eriodictyol<br>hexoside II                          | Several families <sup>a</sup>                                        |          | - | - | - | + |
| 68 | 22.91                 | 288.0569       | 287.0569 | C <sub>15</sub> H <sub>12</sub> O <sub>6</sub>  | 97.7 | -2.5 | 282 | 151.0039;<br>135.0449;<br>125.0241;<br>107.0139;<br>83.0137                            | Eriodictyol                                         | Moraceae ( <i>Ficus<br/>tsiangii</i> ; <i>Ficus<br/>sarmentosa</i> ) | 20,21    | - | + | - | + |
| 69 | 24.46                 | 272.0685       | 271.0617 | C <sub>15</sub> H <sub>12</sub> O <sub>5</sub>  | 98.8 | -2.0 | 289 | 177.0183;<br>151.0034;<br>119.0499;<br>107.0137                                        | Naringenin                                          | Moraceae ( <i>Ficus<br/>tsiangii</i> )                               | 20       | + | + | + | + |
|    | Flavonoids-Flavanols  |                |          |                                                 |      |      |     |                                                                                        |                                                     |                                                                      |          |   |   |   |   |
| 70 | 14.52                 | 290.079        | 289.0717 | C <sub>15</sub> H <sub>14</sub> O <sub>6</sub>  | 81.5 | 0.6  | 278 | 245.0821;<br>205.0497;<br>203.0707;<br>161.0606;<br>125.0245                           | (+)-catechin*                                       | Moraceae ( <i>Ficus<br/>carica</i> )                                 | 10,15,22 | + | + | + | + |
|    | Flavonoid-Flavanonols |                |          |                                                 |      |      |     |                                                                                        |                                                     |                                                                      |          |   |   |   |   |
| 71 | 19.50                 | 304.0583       | 303.0510 | C <sub>15</sub> H <sub>12</sub> O <sub>7</sub>  | 98.7 | -0.1 | 283 | 285.0399;<br>151.0034;<br>125.0240                                                     | Dihydroquercetin<br>(taxifolin)                     | Moraceae ( <i>Ficus<br/>sarmentosa</i> ; <i>Ficus<br/>tsiangii</i> ) | 20,21    | - | + | - | + |
|    | Flavonoid-Isoflavones |                |          |                                                 |      |      |     |                                                                                        |                                                     |                                                                      |          |   |   |   |   |
| 72 | 22.68                 | 548.1166<br>05 | 547.1093 | C <sub>25</sub> H <sub>24</sub> O <sub>14</sub> | 88.6 | -0.7 | -   | 503.1204;<br>299.0558;<br>284.0320;<br>165.0191;<br>149.9954;<br>133.0294;<br>121.0292 | Hydroxygenistein<br>methyl ether<br>malonylhexoside |                                                                      |          | + | - | + | - |

|    |       |          |          |                                                |      |      |             |                                                                                                                               |                                                 |                                                                                                   |                 |   |   |   |   |
|----|-------|----------|----------|------------------------------------------------|------|------|-------------|-------------------------------------------------------------------------------------------------------------------------------|-------------------------------------------------|---------------------------------------------------------------------------------------------------|-----------------|---|---|---|---|
| 73 | 24.46 | 270.0528 | 269.0459 | C <sub>15</sub> H <sub>10</sub> O <sub>5</sub> | 85.5 | -0.9 | 260;<br>330 | 241.0492;<br>225.0556;<br>201.0552;<br>151.0031;133.0<br>292; 119.0504;<br>117.0349;<br>107.0139                              | Genistein*                                      | Moraceae ( <i>Ficus<br/>cordata</i> ; <i>Ficus<br/>nymphaeifolia</i> ;<br><i>Ficus tsiangii</i> ) | 19,20,23<br>,24 | - | - | + | - |
| 74 | 25.82 | 300.0634 | 299.0555 | C <sub>16</sub> H <sub>12</sub> O <sub>6</sub> | 99.6 | 2.2  | 260;<br>335 | 298.0475;<br>285.0357;<br>284.0310;<br>256.0370;<br>240.0419;<br>239.0343;<br>165.0190;<br>149.9955;<br>133.0289;<br>121.0291 | 7-methoxy 2'-<br>hydroxy genistein<br>(cajanin) | Moraceae<br>( <i>Ficus nymphaeifoli<br/>a</i> )                                                   | 23              | + | + | + | + |
| 75 | 26.49 | 354.1103 | 353.1037 | C <sub>20</sub> H <sub>18</sub> O <sub>6</sub> | 97.9 | -1.9 | 266         | 325.1074;<br>298.0472;<br>283.0604;<br>219.0655;<br>175.0397;<br>133.0290;<br>133.0658                                        | Prenylhydroxygenis<br>tein I                    | Fabaceae <sup>d</sup>                                                                             |                 | + | - | + | - |
| 76 | 27.19 | 354.1103 | 353.1034 | C <sub>20</sub> H <sub>18</sub> O <sub>6</sub> | 84.2 | -2.2 | 264         | 325.1074;<br>285.1127;<br>284.0322;<br>219.0657;<br>175.0398;<br>151.0761;<br>133.0657;<br>133.0295                           | Prenylhydroxygenis<br>tein II                   | Fabaceae <sup>d</sup>                                                                             |                 | + | + | + | + |
| 77 | 27.62 | 354.1103 | 353.1037 | C <sub>20</sub> H <sub>18</sub> O <sub>6</sub> | 97.5 | -2.0 | 264;<br>344 | 325.1078;<br>285.1127;<br>284.0320;<br>219.0660;<br>175.0762;<br>151.0761;<br>151.0032;<br>133.0657;<br>133.0293              | Prenylhydroxygenis<br>tein III                  | Fabaceae <sup>d</sup>                                                                             |                 | + | + | + | + |
| 78 | 27.69 | 338.1154 | 337.1087 | C <sub>20</sub> H <sub>18</sub> O <sub>5</sub> | 94.8 | -2.7 | -           | 293.0462;<br>282.0534;<br>269.1190;<br>254.0516;                                                                              | Prenylgenistein I                               | Moraceae ( <i>Ficus<br/>tikoua</i> ; <i>Ficus<br/>mucoso</i> ) <sup>c</sup>                       | 24              | + | + | + | + |

|                         |       |          |          |                                                |      |      |             |                                                                                                     |                                            |                                                   |       |   |   |   |   |
|-------------------------|-------|----------|----------|------------------------------------------------|------|------|-------------|-----------------------------------------------------------------------------------------------------|--------------------------------------------|---------------------------------------------------|-------|---|---|---|---|
| 79                      | 27.82 | 284.0679 | 283.0614 | C <sub>16</sub> H <sub>12</sub> O <sub>5</sub> | 99.7 | -0.5 | -           | 133.0658;<br>117.0346;<br>268.0374;<br>239.0348;<br>151.0040;<br>132.0214;<br>107.0133              | Genistein 4'-methyl<br>ether (biochanin A) | Moraceae<br>( <i>Ficus nymphaeifolia</i> )        | 23    | + | + | + | + |
| 80                      | 28.54 | 338.1154 | 337.1082 | C <sub>20</sub> H <sub>18</sub> O <sub>5</sub> | 98.2 | 0.2  | 265;<br>339 | 293.0449;<br>282.0526;<br>269.0436;<br>268.0368;<br>254.0564;<br>238.0622;<br>225.0469;<br>133.0287 | Prenylgenistein II                         | Moraceae ( <i>Ficus<br/>tikoua</i> ) <sup>e</sup> | 24    | + | + | + | + |
| 81                      | 29.10 | 338.1154 | 337.1084 | C <sub>20</sub> H <sub>18</sub> O <sub>5</sub> | 99.0 | -0.3 | 266;<br>340 | 293.0452;<br>282.0528;<br>269.0446;<br>268.0370;<br>253.0500;<br>254.0574;<br>238.0624;<br>133.0923 | Prenylgenistein III                        | Moraceae ( <i>Ficus<br/>tikoua</i> ) <sup>e</sup> | 24    | + | + | + | + |
| <i>Hydroxycoumarins</i> |       |          |          |                                                |      |      |             |                                                                                                     |                                            |                                                   |       |   |   |   |   |
| 82                      | 13.09 | 340.0794 | 339.0728 | C <sub>15</sub> H <sub>16</sub> O <sub>9</sub> | 94.8 | -2.4 | 279;<br>330 | 177.0191;<br>133.0293                                                                               | Esculetin hexoside I                       | Moraceae<br>( <i>Ficus septica</i> )              | 19,25 | + | + | + | + |
| 83                      | 13.71 | 340.0794 | 339.075  | C <sub>15</sub> H <sub>16</sub> O <sub>9</sub> | 83.4 | -0.1 | 279;<br>335 | 177.0197                                                                                            | Esculetin hexoside<br>II                   | Moraceae<br>( <i>Ficus septica</i> )              | 19,25 | + | - | + | - |
| 84                      | 15.39 | 178.0266 | 177.0187 | C <sub>9</sub> H <sub>6</sub> O <sub>4</sub>   | 97.0 | -3.9 | -           | 149.0241;<br>133.0293;<br>105.0346                                                                  | Dihydroxycoumarin<br>I                     | Moraceae ( <i>Ficus<br/>tsiangii</i> )            | 20    | + | + | + | + |
| 85                      | 18.32 | 206.0215 | 205.0146 | C <sub>10</sub> H <sub>6</sub> O <sub>5</sub>  | 98.6 | -1.8 | 286         | 161.0243;<br>133.0295;<br>117.0348;<br>105.0347;<br>89.0396;<br>77.0398                             | 6-carboxyl-<br>umbelliferone               | Moraceae ( <i>Ficus<br/>tsiangii</i> )            | 20    | + | - | + | - |
| 86                      | 19.34 | 162.0317 | 161.0244 | C <sub>9</sub> H <sub>6</sub> O <sub>3</sub>   | 97.4 | -1.7 | 283;<br>314 | 133.0291;<br>117.0342;<br>105.034                                                                   | 7-<br>Hydroxycoumarin*<br>(umbelliferone)  | Moraceae<br>( <i>Ficus carica</i> )               | 19,27 | + | + | + | + |
| 87                      | 20.86 | 178.0266 | 177.0194 | C <sub>9</sub> H <sub>6</sub> O <sub>4</sub>   | 93.5 | 0.7  | 285         | 149.0247;<br>133.02937;<br>105.0346                                                                 | Dihydroxycoumarin<br>II                    | Moraceae ( <i>Ficus<br/>tsiangii</i> )            | 20    | + | + | + | + |
| 88                      | 22.60 | 206.0579 | 205.0517 | C <sub>11</sub> H <sub>10</sub> O <sub>4</sub> | 92.2 | -5.2 | 244;        | 187.0400;                                                                                           | Phellodenol                                | Moraceae ( <i>Fatoua</i>                          | 28    | + | - | + | - |

|    |                          |          |                    |                                                 |       |                |                        |                                                                                                     |                                                                                                                |                                       |                    |                                  |       |                 |       |
|----|--------------------------|----------|--------------------|-------------------------------------------------|-------|----------------|------------------------|-----------------------------------------------------------------------------------------------------|----------------------------------------------------------------------------------------------------------------|---------------------------------------|--------------------|----------------------------------|-------|-----------------|-------|
|    |                          |          |                    |                                                 |       |                | 252sh<br>; 289;<br>338 | 161.0607;<br>146.0372;<br>133.0657;<br>118.0419;<br>105.0709                                        | A/hydrated form of<br>4',5'-<br>dihydropсорalen                                                                | <i>pilosa</i> )                       |                    |                                  |       |                 |       |
| 89 | 22.94                    | 236.0685 | 235.0616           | C <sub>12</sub> H <sub>12</sub> O <sub>5</sub>  | 97.8  | -1.7           | 255;<br>282            | 217.0499;<br>201.0189;<br>191.0712;<br>176.0477;<br>161.0241;<br>148.0523;<br>133.0293;<br>117.0345 | Murrayacarpin<br>B/di-hydrated form<br>of bergapten                                                            |                                       |                    | +                                | -     | +               | -     |
| 90 | 27.95                    | 230.0943 | 229.0872           | C <sub>14</sub> H <sub>14</sub> O <sub>3</sub>  | 99.5  | -0.4           | -                      | 213.0553;<br>185.0603;<br>146.0368;<br>130.0420;<br>118.0426                                        | Prenyl-7-<br>hydroxycoumarin                                                                                   | Several families <sup>a</sup>         |                    | +                                | +     | +               | -     |
|    | Other<br>s               |          |                    |                                                 |       |                |                        |                                                                                                     |                                                                                                                |                                       |                    |                                  |       |                 |       |
| 91 | 17.88                    | 366.0951 | 365.0964           | C <sub>17</sub> H <sub>18</sub> O <sub>9</sub>  | 97.8  | -1.7           | 244;<br>288;<br>334    | 203.0347;<br>159.0453;<br>131.0497;<br>130.0421;<br>103.0552                                        | (2Z)-3-[6-(β-D-<br>glucopyranosyloxy)<br>-1-benzofuranyl]-2-<br>propenoic acid<br>(psoralic acid<br>glucoside) | <i>Ficus carica</i>                   | <sup>9</sup>       | +                                | -     | +               | -     |
|    | RT<br>(min)              | M        | [M-H] <sup>-</sup> | Formula                                         | Score | Error<br>(ppm) | UV<br>(nm)             | Main fragments<br>via MS/MS                                                                         | Proposed<br>compound                                                                                           | Plant family                          | Refer<br>ence      | Presenc<br>e<br>Tounsi<br>Leaves | Fruit | Temri<br>Leaves | Fruit |
|    | <i>Organic<br/>acids</i> |          |                    |                                                 |       |                |                        |                                                                                                     |                                                                                                                |                                       |                    |                                  |       |                 |       |
| 92 | 2.96                     | 196.0583 | 195.0511           | C <sub>6</sub> H <sub>12</sub> O <sub>7</sub>   | 99.2  | -1.9           | -                      | 129.0189;<br>99.0084;<br>75.0088                                                                    | Gluconic<br>acid/Galactonic<br>acid                                                                            | Oleaceae ( <i>Olea<br/>europaea</i> ) | <sup>29</sup>      | +                                | +     | +               | +     |
| 93 | 3.17                     | 192.0634 | 191.0561           | C <sub>7</sub> H <sub>12</sub> O <sub>6</sub>   | 86.8  | 0.5            | 262                    | 127.0400;<br>93.0340;<br>85.0291                                                                    | Quinic acid                                                                                                    | Moraceae ( <i>Ficus<br/>carica</i> )  | <sup>8,30,31</sup> | +                                | +     | +               | +     |
| 94 | 3.81                     | 134.0215 | 133.0145           | C <sub>4</sub> H <sub>6</sub> O <sub>5</sub>    | 97.2  | -2.1           | 253                    | 115.0037                                                                                            | Malic acid                                                                                                     | Moraceae ( <i>Ficus<br/>carica</i> )  | <sup>8,30,31</sup> | +                                | +     | +               | +     |
| 95 | 4.07                     | 338.0861 | 337.0788           | C <sub>12</sub> H <sub>18</sub> O <sub>11</sub> | 94.5  | -3.5           | 260                    | 277.0600;<br>174.0184;<br>175.0257;<br>115.0039;<br>87.008; 71.0139                                 | Ascorbyl hexoside I                                                                                            |                                       |                    | +                                | -     | +               | -     |



|                    |       |          |          |                                                               |       |      |             |                                                                         |                                                                |                                          |         |   |   |   |   |
|--------------------|-------|----------|----------|---------------------------------------------------------------|-------|------|-------------|-------------------------------------------------------------------------|----------------------------------------------------------------|------------------------------------------|---------|---|---|---|---|
| 96                 | 4.24  | 192.027  | 191.0202 | C <sub>6</sub> H <sub>8</sub> O <sub>4</sub>                  | 98.8  | -2.4 | 261         | 111.0082;<br>87.0081;<br>85.0289                                        | Citric acid I                                                  | Moraceae ( <i>Ficus carica</i> )         | 8,30,31 | + | + | + | + |
| 97                 | 4.62  | 338.0861 | 337.0787 | C <sub>12</sub> H <sub>18</sub> O <sub>11</sub>               | 95.8  | -3.1 | 260         | 277.0570;<br>175.0246;<br>174.0168;<br>115.0038;<br>87.0093;<br>71.0142 | Ascorbyl hexoside II                                           |                                          |         | + | - | + | - |
| 98                 | 5.10  | 192.027  | 191.0203 | C <sub>6</sub> H <sub>8</sub> O <sub>4</sub>                  | 97.7  | -3.0 | 261         | 111.0089;<br>87.0081;<br>85.0289                                        | Citric acid II                                                 | Moraceae ( <i>Ficus carica</i> )         | 8,30,31 | + | + | + | + |
| 99                 | 5.98  | 192.027  | 191.0201 | C <sub>6</sub> H <sub>8</sub> O <sub>4</sub>                  | 99.3  | -1.8 | 261         | 111.0089;<br>87.0086;<br>85.0297                                        | Citric acid III                                                | Moraceae ( <i>Ficus carica</i> )         | 8,30,31 | + | + | + | + |
| 100                | 13.79 | 176.0685 | 175.0613 | C <sub>7</sub> H <sub>12</sub> O <sub>5</sub>                 | 95.9  | -0.6 | 290         | 115.0399;<br>113.0607;<br>85.0661                                       | Isopropylmalic acid                                            | Solanacees ( <i>Solanum esculentum</i> ) | 4       | + | + | + | + |
| <i>Amino acids</i> |       |          |          |                                                               |       |      |             |                                                                         |                                                                |                                          |         |   |   |   |   |
| 101                | 5.43  | 131.0945 | 130.8712 | C <sub>6</sub> H <sub>13</sub> NO <sub>2</sub>                | 99.1  | 1.3  | -           | 88.0407                                                                 | Leucine/isoleucine                                             | Moraceae ( <i>Ficus carica</i> )         | 30,31   | + | - | - | - |
| 102                | 7.70  | 131.0945 | 130.8781 | C <sub>6</sub> H <sub>13</sub> NO <sub>2</sub>                | 86.2  | -3.6 | -           | 88.0407                                                                 | Leucine/isoleucine                                             | Moraceae ( <i>Ficus carica</i> )         | 30,31   | + | - | - | - |
| 103                | 8.22  | 181.0739 | 180.0669 | C <sub>9</sub> H <sub>11</sub> NO <sub>3</sub>                | 89.84 | -2.1 | 268         | 163.0405;<br>119.0507;<br>93.0353;<br>72.0095                           | Tyrosine                                                       | Moraceae ( <i>Ficus carica</i> )         | 30,31   | - | + | - | + |
| 104                | 10.32 | 165.079  | 164.0719 | C <sub>9</sub> H <sub>11</sub> NO <sub>2</sub>                | 99.36 | -1.4 | 262         | 147.0458;<br>103.0553                                                   | Phenylalanine                                                  | Moraceae ( <i>Ficus carica</i> )         | 30,31   | + | + | + | + |
| 105                | 12.84 | 204.0899 | 203.083  | C <sub>11</sub> H <sub>12</sub> N <sub>2</sub> O <sub>2</sub> | 86.7  | -1.8 | 279         | 116.0501                                                                | Tryptophan                                                     | Moraceae ( <i>Ficus carica</i> )         | 30,31   | + | + | + | + |
| 106                | 17.48 | 207.0895 | 206.0831 | C <sub>11</sub> H <sub>13</sub> NO <sub>3</sub>               | 96    | -3.8 | 270         | 164.0718;<br>147.0444;<br>103.0555                                      | Acetyl phenylalanine                                           |                                          |         | + | + | + | + |
| 107                | 18.81 | 246.1004 | 245.0936 | C <sub>13</sub> H <sub>14</sub> N <sub>2</sub> O <sub>3</sub> | 95    | -4.5 | 224;<br>279 | 203.0822;<br>116.0505                                                   | Acetyl tryptophan                                              | Solanaceae ( <i>Solanum esculentum</i> ) | 4       | + | + | + | + |
| <i>Other s</i>     |       |          |          |                                                               |       |      |             |                                                                         |                                                                |                                          |         |   |   |   |   |
| 108                | 17.71 | 532.2520 | 531.2461 | C <sub>25</sub> H <sub>40</sub> O <sub>12</sub>               | 96.11 | -2.4 | 253         | 387.2023;<br>369.1918;<br>225.1497;<br>207.1389;<br>179.0561            | 13-Hydroxyblumenol C 9-O-[3'-O-(3"-hydroxy-3"-methylglutaryl)- | Amaryllidaceae ( <i>Allium porrum</i> )  | 33      | + | - | + | - |

|    |       |          |          |                                                |       |      |     |           |               |           |               |   |   |   |   |
|----|-------|----------|----------|------------------------------------------------|-------|------|-----|-----------|---------------|-----------|---------------|---|---|---|---|
|    |       |          |          |                                                |       |      |     |           | glucoside]    |           |               |   |   |   |   |
| 10 | 19.14 | 210.0528 | 209.0462 | C <sub>10</sub> H <sub>10</sub> O <sub>5</sub> | 97.88 | -2.8 | 280 | 191.0349; | Macrophyllide | Rubiaceae | <sup>34</sup> | + | - | + | - |
| 9  |       |          |          |                                                |       |      |     | 165.0555; |               |           |               |   |   |   |   |
|    |       |          |          |                                                |       |      |     | 163.0400; |               |           |               |   |   |   |   |
|    |       |          |          |                                                |       |      |     | 150.0320; |               |           |               |   |   |   |   |
|    |       |          |          |                                                |       |      |     | 137.0608; |               |           |               |   |   |   |   |
|    |       |          |          |                                                |       |      |     | 119.0501; |               |           |               |   |   |   |   |
|    |       |          |          |                                                |       |      |     | 106.0422  |               |           |               |   |   |   |   |

<sup>a</sup>Compounds described here for first time in family Moraceae. Several saccharide combinations and conjugation positions are reported in different plant families (see KNApSack, Reaxys or SciFinder databases)

<sup>b</sup>Apigenin *C*-hexoside pentoside could be schaftoside (apigenin 6-*C*-glucoside 8-*C*-arabinoside) or isochaftoside (apigenin 6-*C*-arabinoside 8-*C*-glucoside). The latter were previously described in *Ficus carica* leaves.<sup>9</sup>

<sup>c</sup>The identification was based on the elution pattern under similar analytical conditions.<sup>17</sup>

<sup>d</sup>Compounds described here for first time in family Moraceae and common in the family Fabaceae (see KNApSack, Reaxys or SciFinder databases)

<sup>e</sup>6-, 8- and 3'-prenylgenistein were previously reported in other *Ficus* species.

\*Identification confirmed by comparison with standards. RT, retention time; Exp., experimental. The UV data agreed with Gómez-Romero et al.<sup>4</sup>; Lin et al.<sup>32</sup>

## References

1. I. M. Abu-Reidah, M. M. Contreras, D. Arráez-Román, A. Segura-Carretero, and A. Fernández-Gutiérrez, *Journal of Chromatography A*, 2013, **1313**, 212–227.
2. Y. Zhao, X. Li, X. Zeng, S. Huang, S. Hou, and X. Lai, *Analytical Methods*, 2014, **6**, 1359–1363.
3. H. Lazreg Aref, B. Gaaliche, A. Fekih, M. Mars, M. Aouni, J. Pierre Chaumon, and K. Said, *Natural product research*, 2011, **25**, 310–319.
4. M. Gómez-Romero, A. Segura-Carretero, and A. Fernández-Gutiérrez, *Phytochemistry*, 2010, **71**, 1848–1864.
5. T. Beelders, D. de Beer, M. A. Stander, and E. Joubert, *Molecules (Basel, Switzerland)*, 2014, **19**, 11760–11790.
6. I. M. Abu-Reidah, D. Arráez-Román, A. Segura-Carretero, and A. Fernández-Gutiérrez, *Food Chemistry*, 2013, **141**, 2269–2277.
7. D. M. Teixeira, R. F. Patão, A. V. Coelho, and C. T. Da Costa, *Journal of Chromatography A*, 2006, **1103**, 22–28.
8. A. P. Oliveira, P. Valentão, J. A. Pereira, B. M. Silva, F. Tavares, and P. B. Andrade, *Food and Chemical Toxicology*, 2009, **47**, 2841–2846.
9. T. Takahashi, A. Okiura, K. Saito, and M. Kohno, *Journal of Agricultural and Food Chemistry*, 2014, **62**, 10076–10083.
10. A. Slatnar, U. Klancar, F. Stampar, and R. Veberic, *Journal of Agricultural and Food Chemistry*, 2011, **59**, 11696–11702.
11. G. Pande and C. C. Akoh, *Food Chemistry*, 2010, **120**, 1067–1075.
12. M. Dueñas, I. Estrella, and T. Hernández, *European Food Research and Technology*, 2004, **219**, 116–123.
13. F. Stehle, W. Brandt, J. Schmidt, C. Milkowski, and D. Strack, *Phytochemistry*, 2008, **69**, 1826–31.

14. C. E. Narváez-Cuenca, J. P. Vincken, and H. Gruppen, *Food Chemistry*, 2012, **130**, 730–738.
15. F. Vallejo, J. G. Marín, and F. A. Tomás-Barberán, *Food Chemistry*, 2012, **130**, 485–492.
16. E. Faleh, A. P. Oliveira, P. Valentão, A. Ferchichi, B. M. Silva, and P. B. Andrade, *Revista Brasileira de Farmacognosia*, 2012, **22**, 1282–1289.
17. N. Tahir, K. Shaari, and F. Abas, *Journal of Agricultural and Food Chemistry*, 2012, **60**, 11201–11210.
18. C. Y. Choo, N. Y. Sulong, F. Man, and T. W. Wong, *Journal of ethnopharmacology*, 2012, **142**, 776–81.
19. E. P. Lansky, H. M. Paavilainen, A. D. Pawlus, and R. A. Newman, *Journal of Ethnopharmacology*, 2008, **119**, 195–213.
20. Y. Wang, H. Liang, Q. Zhang, W. Cheng, and S. Yi, *Biochemical Systematics and Ecology*, 2014, **57**, 210–215.
21. X.-G. Wang, X.-Y. Wei, Y.-Q. Tian, L.-T. Shen, and H.-H. Xu, *Agricultural Sciences in China*, 2010, **9**, 690–694.
22. R. Veberic, M. Colaric, and F. Stampar, *Food Chemistry*, 2008, **106**, 153–157.
23. N. Darbour, C. Bayet, S. Rodin-Bercion, Z. Elkhomsi, F. Lurel, A. Chaboud, and D. Guilet, *Natural Product Research*, 2007, **21**, 461–464.
24. S. Wei, W. Wu, and Z. Ji, *International Journal of Molecular Sciences*, 2012, **13**, 7375–7382.
25. P. L. Wu, K. V. Rao, C. H. Su, C. S. Kuoh, and T. S. Wu, *Heterocycles*, 2002, **57**, 2401–2408.
26. V. Kuete, B. Ngameni, C. C. F. Simo, R. K. Tankeu, B. T. Ngadjui, J. J. M. Meyer, N. Lall, and J. R. Kuate, *Journal of Ethnopharmacology*, 2008, **120**, 17–24.
27. G. Innocenti, A. Bettero, and G. Caporale, *Il Farmaco; edizione scientifica*, 1982, **37**, 475–485.
28. C. Chiang, M. Cheng, C. Peng, H. Huang, and I. Chen, *Chemistry & biodiversity*, 2010, **7**, 1728–1736.
29. R. Quirantes-Piné, J. Lozano-Sánchez, M. Herrero, E. Ibáñez, A. Segura-Carretero, and A. Fernández-Gutiérrez, *Phytochemical Analysis*, 2013, **24**, 213–223.
30. A. P. Oliveira, L. R. Silva, F. Ferreres, P. G. De Pinho, P. Valentão, B. M. Silva, J. A. Pereira, and P. B. Andrade, *Journal of Agricultural and Food Chemistry*, 2010, **58**, 3393–3398.
31. M. I. Barolo, N. Ruiz Mostacero, and S. N. López, *Food Chemistry*, 2014, **164**, 119–127.
32. L. Z. Lin, J. Harnly, R. W. Zhang, X. E. Fan, and H. J. Chen, *Journal of Agricultural and Food Chemistry*, 2012, **60**, 544–553.
33. W. Schliemann, B. Kolbe, J. Schmidt, M. Nimtz, and V. Wray, *Phytochemistry*, 2008, **69**, 1680–1688.
34. S.-K. Ling, T. Tanaka, and I. Kouno, *Journal of Natural Products*, 2001, **64**, 796–798.

**Table S2:** Phenolic compounds characterized using the positive ionization mode in leaves and fruits of *F. carica* cultivars ‘Tounsi’ and ‘Temri’.

|                        | RT    | M        | [M+H] <sup>+</sup> | Formula                                         | Score | Error | UV            | Main fragments <i>via</i><br>MS/MS                                            | Proposed compound                        | Plant family                           | Ref. | Presence |       |        |       |
|------------------------|-------|----------|--------------------|-------------------------------------------------|-------|-------|---------------|-------------------------------------------------------------------------------|------------------------------------------|----------------------------------------|------|----------|-------|--------|-------|
|                        | (min) |          |                    |                                                 |       | (ppm) | (nm)          |                                                                               |                                          |                                        |      | Tounsi   |       | Temri  |       |
|                        |       |          |                    |                                                 |       |       |               |                                                                               |                                          |                                        |      | Leaves   | Fruit | Leaves | Fruit |
| <i>Anthocyanins</i>    |       |          |                    |                                                 |       |       |               |                                                                               |                                          |                                        |      |          |       |        |       |
| 1                      | 11.51 | 611.1612 | 611.1603           | C <sub>27</sub> H <sub>31</sub> O <sub>16</sub> | 93.9  | -0.3  | 520           | 449.1078; 287.0565                                                            | Cyanidin 3,5-diglucoside                 | Moraceae ( <i>Ficus carica</i> )       | 1    | -        | +     | -      | +     |
| 2                      | 13.13 | 595.1663 | 595.1667           | C <sub>27</sub> H <sub>31</sub> O <sub>15</sub> | 98.5  | 0.5   | 520           | 449.1073; 287.0547                                                            | Cyanidin 3-rutinoside                    | Moraceae ( <i>Ficus carica</i> )       | 1    | -        | +     | -      | +     |
| <i>Furanocoumarins</i> |       |          |                    |                                                 |       |       |               |                                                                               |                                          |                                        |      |          |       |        |       |
| 3                      | 15.97 | 364.0794 | 365.0872           | C <sub>17</sub> H <sub>16</sub> O <sub>9</sub>  | 98.6  | -0.9  | 250; 264; 308 | 203.0336; 175.0438; 147.0438; 131.0387; 119.0487; 101.0387; 91.0540           | Hydroxypsoralen hexoside I <sup>a</sup>  | Umbelliferae ( <i>Glehniae Radix</i> ) | 2    | +        | -     | +      | -     |
| 4                      | 16.65 | 364.0974 | 365.0871           | C <sub>17</sub> H <sub>16</sub> O <sub>9</sub>  | 96.9  | -1.0  | 252; 264; 310 | 203.0336; 175.0389; 147.0440; 131.0395; 119.0485; 91.0539                     | Hydroxypsoralen hexoside II <sup>a</sup> | Umbelliferae ( <i>Glehniae Radix</i> ) | 2    | +        | -     | +      | -     |
| 5                      | 17.58 | 246.0892 | 247.0969           | C <sub>14</sub> H <sub>14</sub> O <sub>4</sub>  | 94.3  | -2.4  | -             | 229.0845; 213.0548; 189.0574; 175.0393; 147.0438; 119.0489; 103.0545          | Marmesin isomer I <sup>b</sup>           | Moraceae ( <i>Ficus carica</i> )       | 3    | +        | +     | +      | +     |
| 6                      | 17.64 | 408.1420 | 409.1496           | C <sub>20</sub> H <sub>24</sub> O <sub>9</sub>  | 96.2  | -1.0  | -             | 247.0962; 229.0862; 213.0545; 185.0602; 175.0389; 147.0348; 119.0487; 91.0543 | Marmesinin                               | Umbelliferae ( <i>Glehniae Radix</i> ) | 2    | +        | -     | +      | -     |
| 7                      | 17.77 | 234.0528 | 235.0606           | C <sub>12</sub> H <sub>10</sub> O <sub>5</sub>  | 93.2  | -3.3  | 256; 303      | 217.0505; 202.0259; 174.0547; 131.0489; 115.0537                              | Methoxypsoralen derivative (hydrate)     |                                        |      | +        | -     | +      | -     |
| 8                      | 21.8  | 188.0473 | 189.0549           | C <sub>11</sub> H <sub>8</sub> O <sub>3</sub>   | 86.9  | -1.5  | 250; 290      | 161.0605; 147.0441; 133.0644; 119.0489; 105.0700                              | 4',5'-Dihydropsoralen                    | Moraceae ( <i>Ficus carica</i> )       | 3,4  | +        | -     | +      | -     |
| 9                      | 22.05 | 246.0892 | 247.0971           | C <sub>14</sub> H <sub>14</sub> O <sub>4</sub>  | 95.0  | -2.6  | 255           | 229.0858; 213.0545; 189.0537; 175.0392; 147.0442; 119.0492; 103.0544          | Marmesin isomer II <sup>b</sup>          | Moraceae ( <i>Ficus carica</i> )       | 3    | +        | +     | +      | +     |
| 10                     | 22.30 | 304.0947 | 305.1030           | C <sub>16</sub> H <sub>16</sub> O <sub>6</sub>  | 95.7  | -3.0  | 257; 266; 310 | 203.0344; 175.0391; 159.0441; 147.0438; 131.0489; 119.0490                    | Oxypeucedanin hydrate                    | Moraceae ( <i>Ficus pumila</i> )       | 5    | +        | -     | +      | -     |
| 11                     | 22.48 | 202.0266 | 203.0343           | C <sub>11</sub> H <sub>6</sub> O <sub>4</sub>   | 85.8  | -2.0  | 254; 269; 306 | 147.0442; 131.0494; 129.0332; 119.0496;                                       | Hydroxypsoralen <sup>c,d</sup>           | Umbelliferae ( <i>Radix glehniae</i> ) | 2    | +        | -     | +      | -     |

101,0376; 91.0541

|                          |       |          |          |                                                |      |      |                  |                                                                                                      |                                          |                                        |     |   |   |   |   |
|--------------------------|-------|----------|----------|------------------------------------------------|------|------|------------------|------------------------------------------------------------------------------------------------------|------------------------------------------|----------------------------------------|-----|---|---|---|---|
| 12                       | 24.46 | 186.0317 | 187.0317 | C <sub>11</sub> H <sub>6</sub> O <sub>3</sub>  | 80.0 | -1.7 | 254; 296;<br>328 | 159.0440; 131.0492;<br>115.0542; 103.0543                                                            | Psoralen                                 | Moraceae ( <i>Ficus carica</i> )       | 6–9 | + | + | + | + |
| 13                       | 26.01 | 216.0423 | 217.0502 | C <sub>12</sub> H <sub>8</sub> O <sub>4</sub>  | 97.6 | -2.4 | 258; 266;<br>310 | 202.0259; 174.0311;<br>159.0447; 146.0359;<br>131.0490; 118.0410;<br>115.0486                        | Methoxypsoralen                          | Moraceae ( <i>Ficus carica</i> )       | 6–9 | + | + | + | + |
| 14                       | 26.26 | 286.0841 | 287.0918 | C <sub>16</sub> H <sub>14</sub> O <sub>5</sub> | 99.4 | -1.2 | -                | 203.0338; 175.1124;<br>159.0429; 147.0430;<br>131.0477; 119.0487;<br>103.0550                        | Oxypeucedanin                            | Umbelliferae ( <i>Radix glehniae</i> ) | 2   | + | - | + | - |
| 15                       | 28.25 | 270.0892 | 271.0980 | C <sub>16</sub> H <sub>14</sub> O <sub>4</sub> | 91.8 | -5.3 | -                | 229.0503; 215.0349;<br>203.0349; 201.0554;<br>187.0397; 173.0603;<br>159.0448; 131.0495;<br>117.0702 | Isopentenoxypsoralen <sup>d</sup>        | Moraceae and other families            |     | + | - | + | - |
| 16                       | 31.16 | 284.1049 | 285.1131 | C <sub>17</sub> H <sub>16</sub> O <sub>4</sub> | 95.5 | -3.4 | 268; 309         | 243.0638; 229.0478;<br>217.0473; 201.0530;<br>186.0293; 115.0521                                     | Prenyl methoxypsoralen                   | Moraceae ( <i>Dorstenia</i> spp.)      | 10  | + | + | + | + |
| Isoflavones <sup>e</sup> |       |          |          |                                                |      |      |                  |                                                                                                      |                                          |                                        |     |   |   |   |   |
| 17                       | 30.85 | 298.0841 | 299.0906 | C <sub>17</sub> H <sub>14</sub> O <sub>5</sub> | 96.5 | 2.9  | 262; 329         | 284.0660; 267.0633;<br>256.0711; 243.0998;<br>166.0242; 137.0576                                     | Hydroxy-dimethoxyisoflavone <sup>f</sup> | Fabaceae                               |     | + | + | + | + |
| Others                   |       |          |          |                                                |      |      |                  |                                                                                                      |                                          |                                        |     |   |   |   |   |
| 18                       | 17.21 | 204.0423 | 205.0502 | C <sub>11</sub> H <sub>8</sub> O <sub>4</sub>  | 96.1 | -3.5 | 255; 290;<br>335 | 243.0638; 229.0478;<br>215.0682; 201.0530;<br>186.0293; 157.0627;<br>129.0674; 115.0521              | Psoralic acid/dihydro-hydroxypsoralen    |                                        |     | + | - | + | - |

<sup>a</sup> Hydroxypsoralen hexoside could be 5-hydroxypsoralen hexoside (bergaptol hexoside) or 8-hydroxypsoralen hexoside (xanthoxol hexoside)

<sup>b</sup> Marmesin was previously described in *F. carica*<sup>4</sup> and its enantiomeric form nodakenetin<sup>11</sup> in *Ficus tsiangii*

<sup>c</sup> Hydroxypsoralen could be 5-hydroxypsoralen (bergaptol) or 8-hydroxypsoralen (xanthoxol) according to Yang et al.<sup>2</sup>

<sup>d</sup> Compounds described here for first time in *F. carica* but described in family Moraceae and other families (see KNApSack, Reaxys or SciFinder databases)

<sup>e</sup> Non detected in negative ionization mode

<sup>f</sup> Compounds described here for first time in family Moraceae and common in the family Fabaceae (see KNApSack, Reaxys or SciFinder databases)

RT, retention time; Exp., experimental. The UV data agreed with Dueñas *et al.*,<sup>1</sup> Frérot *et al.*,<sup>12</sup> Teixeira *et al.*,<sup>6</sup> Tang *et al.*<sup>13</sup>

## References

1. M. Dueñas, J. J. Pérez-Alonso, C. Santos-Buelga, and T. Escribano-Bailón, *Journal of Food Composition and Analysis*, 2008, **21**, 107–115.
2. W. Yang, M. Ye, M. Liu, D. Kong, R. Shi, X. Shi, K. Zhang, Q. Wang, and Z. Lantong, *Journal of Chromatography A*, 2010, **1217**, 4587–4600.
3. E. P. Lansky, H. M. Paavilainen, A. D. Pawlus, and R. A. Newman, *Journal of Ethnopharmacology*, 2008, **119**, 195–213.
4. G. Innocenti, A. Bettero, and G. Caporale, *Il Farmaco; edizione scientifica*, 1982, **37**, 475–485.
5. E. A. Juan, J. A. Rideout, and C. Y. Ragasa, *Philippine Journal of Science (Philippines)*, 1997.
6. D. M. Teixeira, R. F. Patão, A. V. Coelho, and C. T. Da Costa, *Journal of Chromatography A*, 2006, **1103**, 22–28.
7. A. P. Oliveira, P. Valentão, J. A. Pereira, B. M. Silva, F. Tavares, and P. B. Andrade, *Food and Chemical Toxicology*, 2009, **47**, 2841–2846.
8. M. Marrelli, F. Menichini, G. A. Statti, M. Bonesi, P. Duez, F. Menichini, and F. Conforti, *Food and Chemical Toxicology*, 2012, **50**, 726–733.
9. T. Takahashi, A. Okiura, K. Saito, and M. Kohno, *Journal of Agricultural and Food Chemistry*, 2014, **62**, 10076–10083.
10. R. Heinke, K. Franke, K. Michels, L. Wessjohann, N. A. A. Ali, and J. Schmidt, *Journal of Mass Spectrometry*, 2012, **47**, 7–22.
11. Y. Wang, H. Liang, Q. Zhang, W. Cheng, and S. Yi, *Biochemical Systematics and Ecology*, 2014, **57**, 210–215.
12. E. Frérot and E. Decorzant, *Journal of agricultural and food chemistry*, 2004, **52**, 6879–6886.
13. D.-Q. Tang, X.-X. Zheng, X. Chen, D.-Z. Yang, and Q. Du, *Journal of Pharmaceutical Analysis*, 2014, **4**, 96–106.

**Table S3:** Chromatographic and mass spectrometric information about unknown compounds found in the negative ionization mode.

|   | RT<br>(min) | M        | [M-H] <sup>-</sup> | Formula                                         | Score | Error<br>(ppm) | UV<br>(nm) | Main fragments <i>via</i> MS/MS           | DBE <sup>a</sup> | Brief description                 | Presence |       |        |       |
|---|-------------|----------|--------------------|-------------------------------------------------|-------|----------------|------------|-------------------------------------------|------------------|-----------------------------------|----------|-------|--------|-------|
|   |             |          |                    |                                                 |       |                |            |                                           |                  |                                   | Tounsi   |       | Temri  |       |
|   |             |          |                    |                                                 |       |                |            |                                           |                  |                                   | Leaves   | Fruit | Leaves | Fruit |
| 1 | 14.18       | 460.1581 | 459.1512           | C <sub>20</sub> H <sub>28</sub> O <sub>12</sub> | 98.3  | -1.4           | 296        | 167.0347; 152.0113;<br>123.0449; 108.0214 | 7                | Derivative of vanillic acid       | +        | +     | +      | +     |
| 2 | 14.27       | 606.2097 | 605.2093           | C <sub>26</sub> H <sub>38</sub> O <sub>16</sub> | 97.6  | -1.2           | 302        | 167.0346; 152.0110;<br>123.0446; 108.0216 | 8                | Derivative of vanillic acid       | +        | +     | +      | +     |
| 4 | 16.20       | 372.1056 | 371.0991           | C <sub>16</sub> H <sub>20</sub> O <sub>10</sub> | 98.0  | -1.4           | 274; 326   | 249.0609; 189.0402;<br>121.0294           | 7                | Benzoyl derivative                | +        | +     | +      | +     |
| 5 | 16.33       | 472.1581 | 471.1515           | C <sub>21</sub> H <sub>28</sub> O <sub>12</sub> | 99.2  | -0.4           | 272; 332   | 137.0240                                  | 8                | Derivative of hydroxybenzoic acid | +        | +     | +      | +     |
| 6 | 16.57       | 502.1686 | 501.1629           | C <sub>22</sub> H <sub>30</sub> O <sub>13</sub> | 93.0  | -3.3           | 294        | 167.0351; 152.0112;<br>123.0449; 108.0216 | 8                | Derivative of vanillic acid       | +        | +     | +      | +     |
| 7 | 16.69       | 648.2265 | 647.2204           | C <sub>28</sub> H <sub>40</sub> O <sub>17</sub> | 98.2  | -1.3           | 268; 320   | 167.0350; 152.0111;<br>123.0451; 108.0219 | 7                | Derivative of vanillic acid       | +        | +     | +      | +     |
| 8 | 20.75       | 528.1773 | 527.1783           | C <sub>24</sub> H <sub>32</sub> O <sub>13</sub> | 99.8  | -0.4           | -          | 167.0348; 152.0110;<br>123.0449; 108.0216 | 9                | Derivative of vanillic acid       | -        | +     | -      | +     |

<sup>a</sup>The calculated number of rings and double bonds in the formula.
